# Supplementary material for: Evidence for near-superionic conductivity in the Li3BS3 electrolyte and insights on the lithium orthothioborate transport mechanisms
Source: Royal Society of Chemistry journal article supplement (doi:10.1039/d4cp03771e), 2025-01-01
Supplement: d4cp03771e1.pdf [file d4cp03771e1.pdf]

## Supplementary Information

### Evidence for Near-Superionic Conductivity in the $\text{Li}_3\text{BS}_3$ Electrolyte: Insights on the Lithium Orthothioborate Transport Mechanisms

Aarya D. Riasati,<sup>a</sup> William A. Goddard III,<sup>a,\*</sup> Tridip Das,<sup>a,\*</sup>

<sup>a</sup>Materials and Process Simulation Center, California Institute of Technology, Pasadena, CA, 91125, USA

#### Contents

|                                                         |    |
|---------------------------------------------------------|----|
| Supplementary Tables.....                               | 1  |
| Graph of MSD vs Time for 200K .....                     | 2  |
| Graph of MSD vs Time for 300K .....                     | 3  |
| Graph of MSD vs Time for 400K .....                     | 4  |
| Graph of MSD vs Time for 425K .....                     | 5  |
| Graph of MSD vs Time for 450K .....                     | 6  |
| Graph of MSD vs Time for 475K .....                     | 7  |
| Graph of MSD vs Time for 500K .....                     | 8  |
| Graph of MSD vs Time for 600K .....                     | 9  |
| Disordered Structure at High T (600K) .....             | 10 |
| Supplementary Data File for MD.....                     | 11 |
| Forcefield Nonbond, Angle, and Bonding Parameters ..... | 41 |
| Charges Implemented on Li, B, and S .....               | 42 |
| References .....                                        | 43 |

Table 1. MSD Plot of Li<sup>+</sup> Diffusion at 200K.

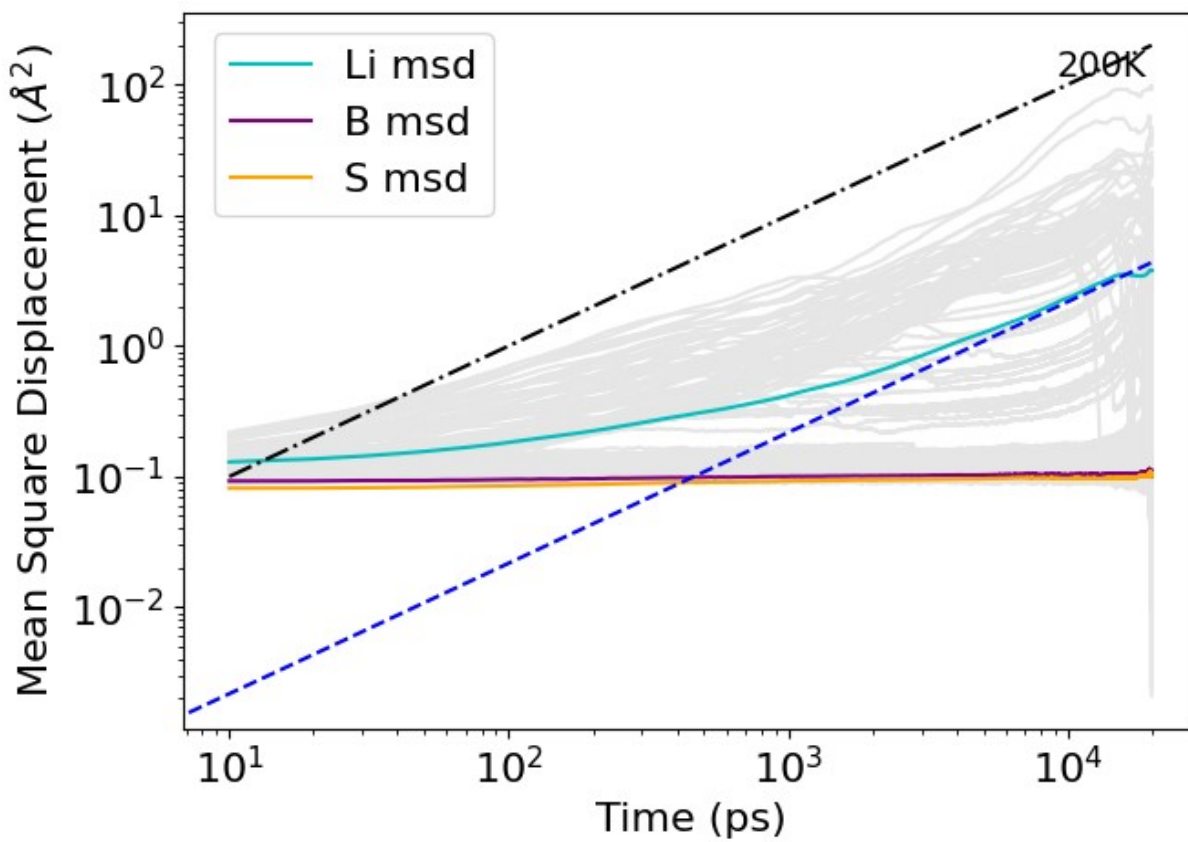

Table 2. MSD Plot of Li<sup>+</sup> Diffusion at 300K.

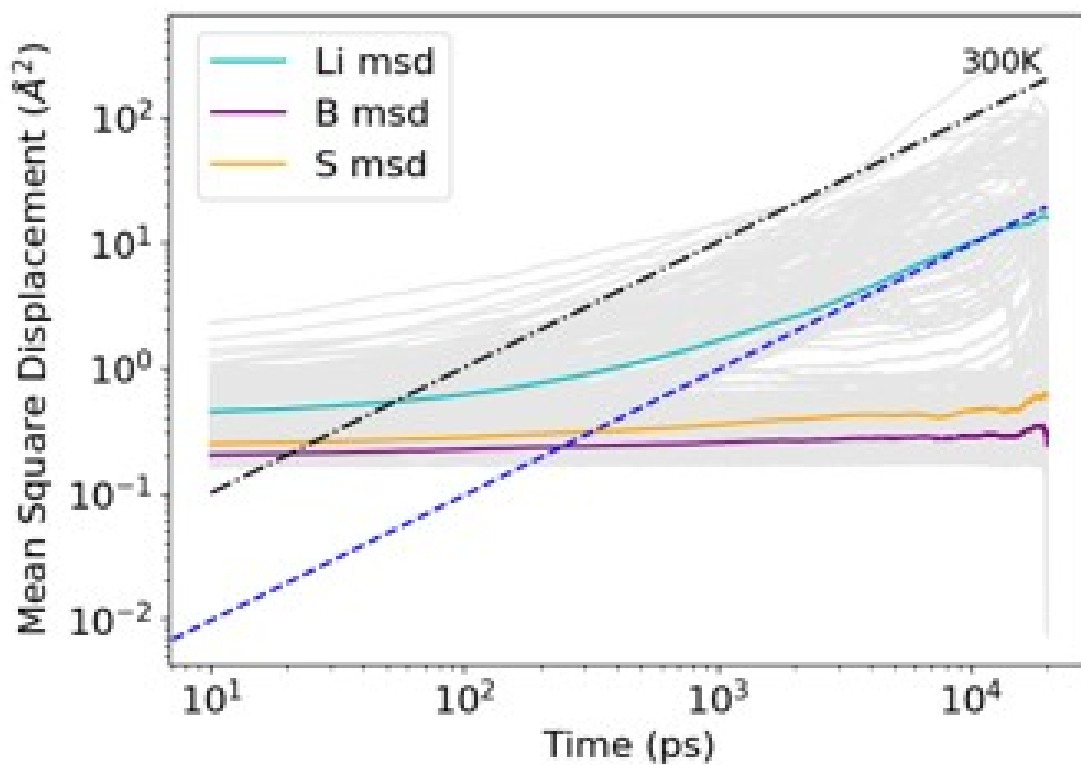

Table 3. MSD Plot of Li<sup>+</sup> Diffusion at 400K.

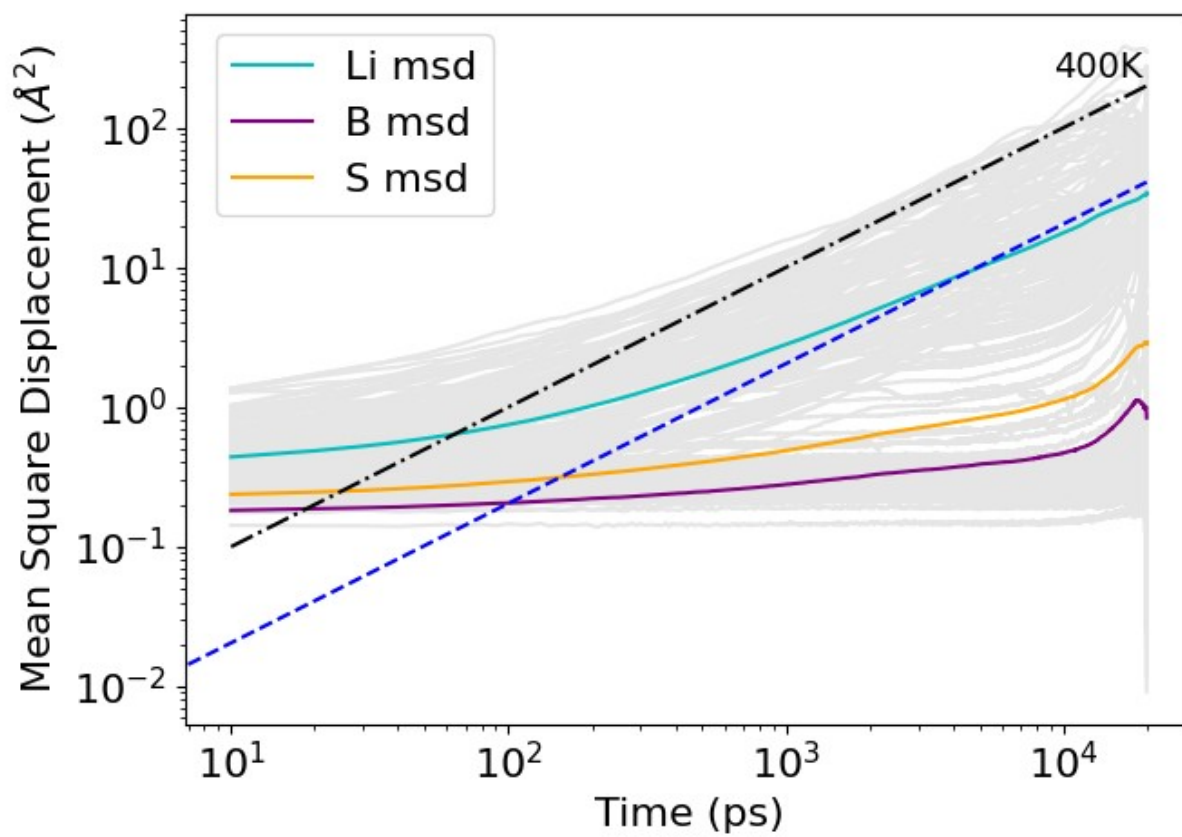

Table 4. MSD Plot of Li<sup>+</sup> Diffusion at 425K

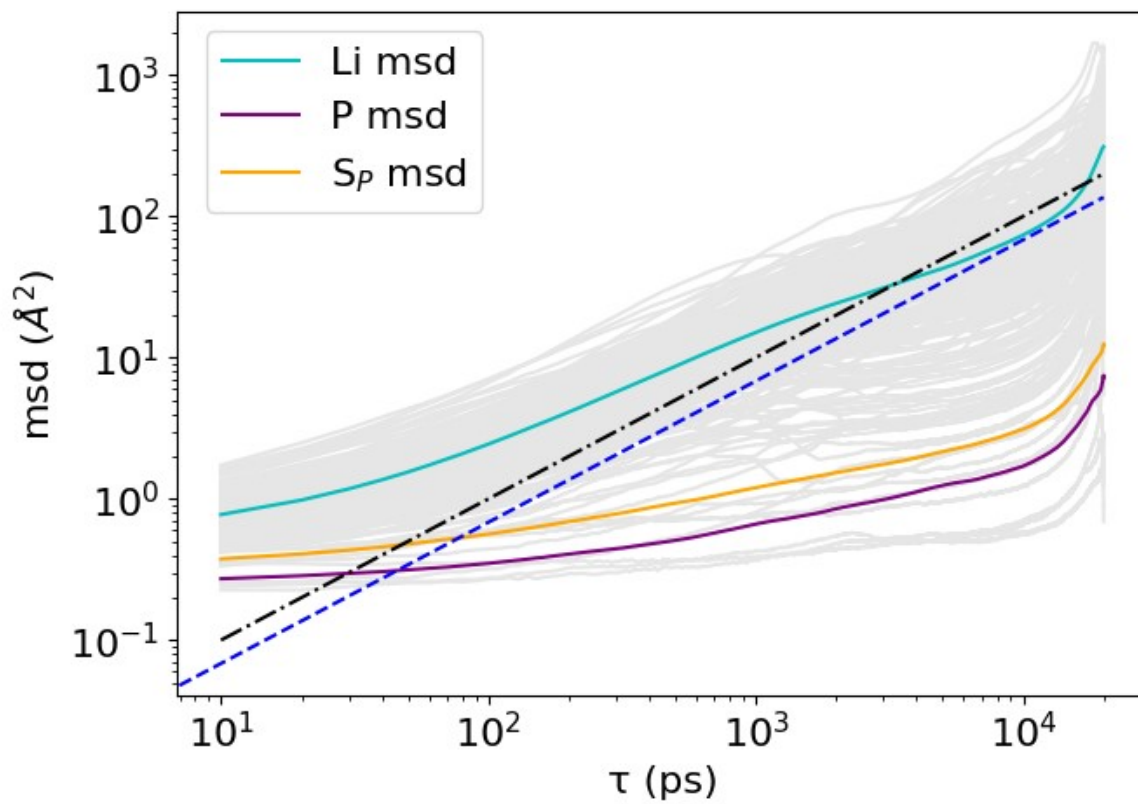

Table 5. MSD Plot of Li<sup>+</sup> Diffusion at 450K

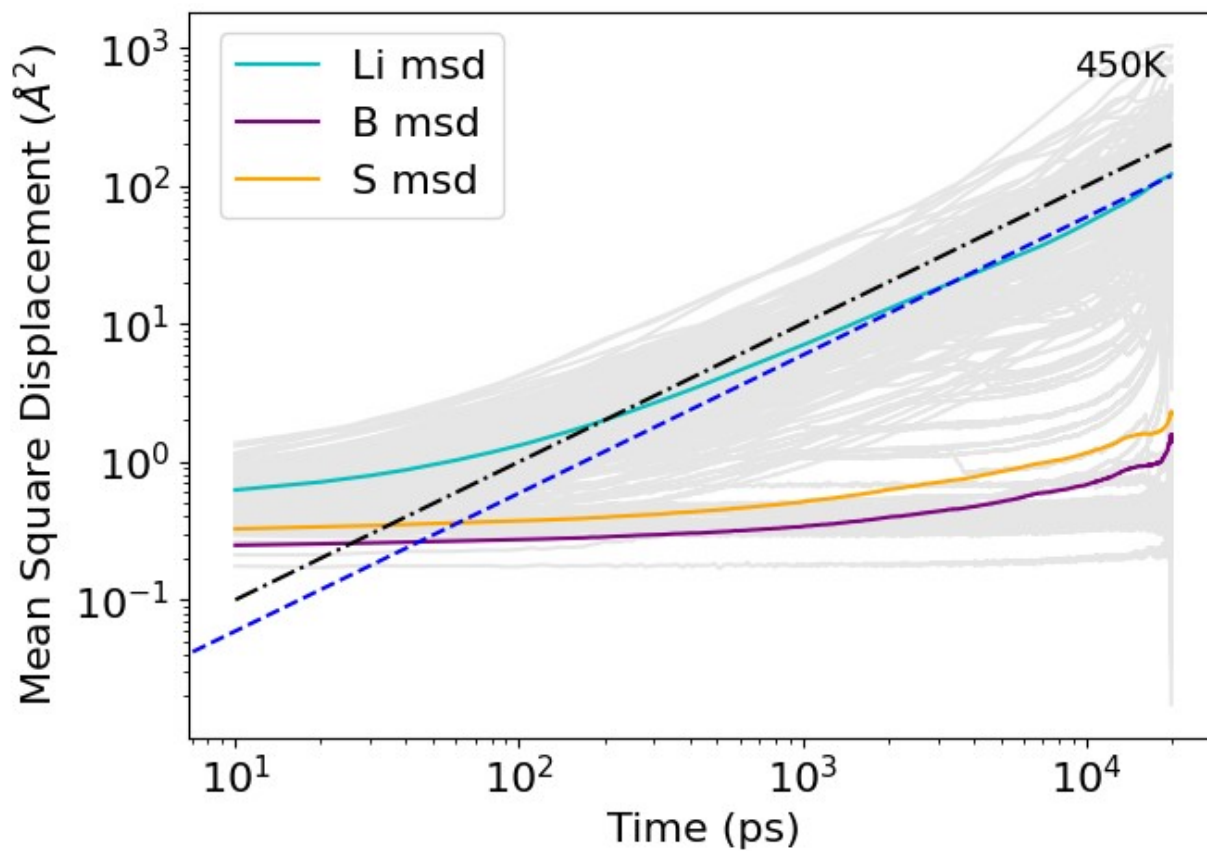

Table 6. MSD Plot of Li<sup>+</sup> Diffusion at 475K

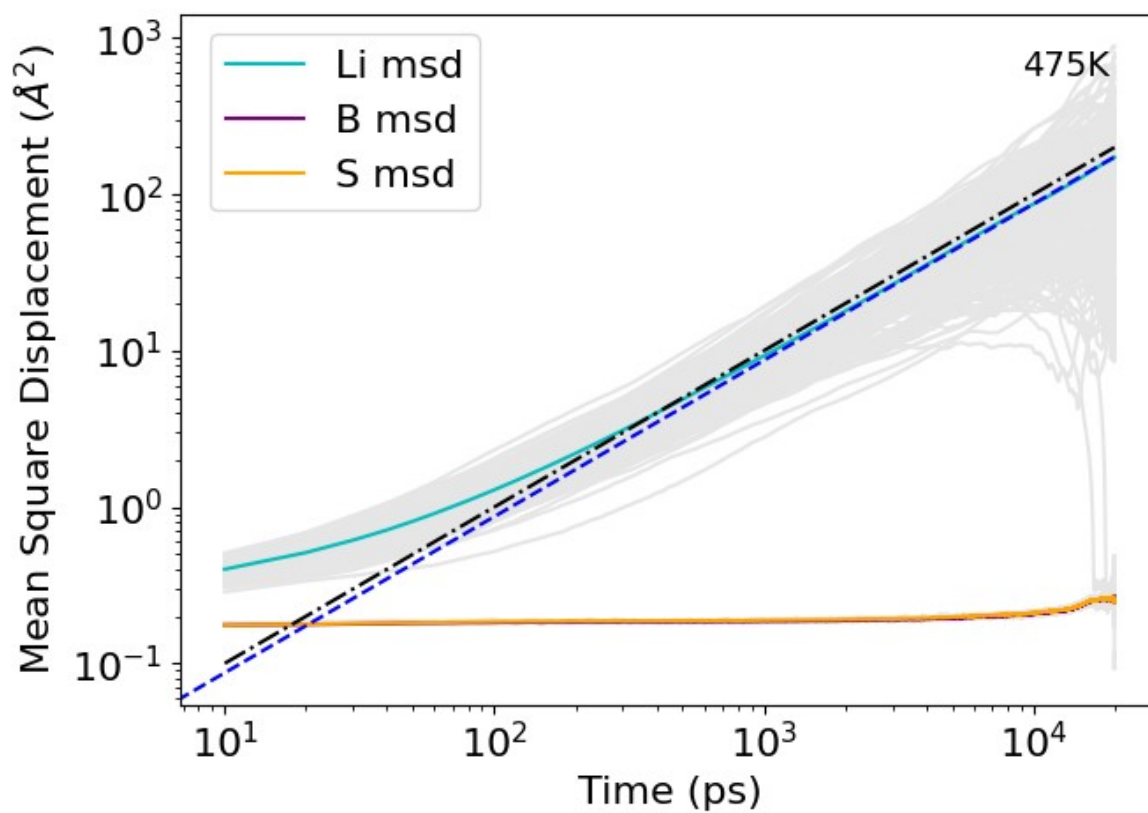

Table 7. MSD Plot of Li<sup>+</sup> Diffusion at 500K.

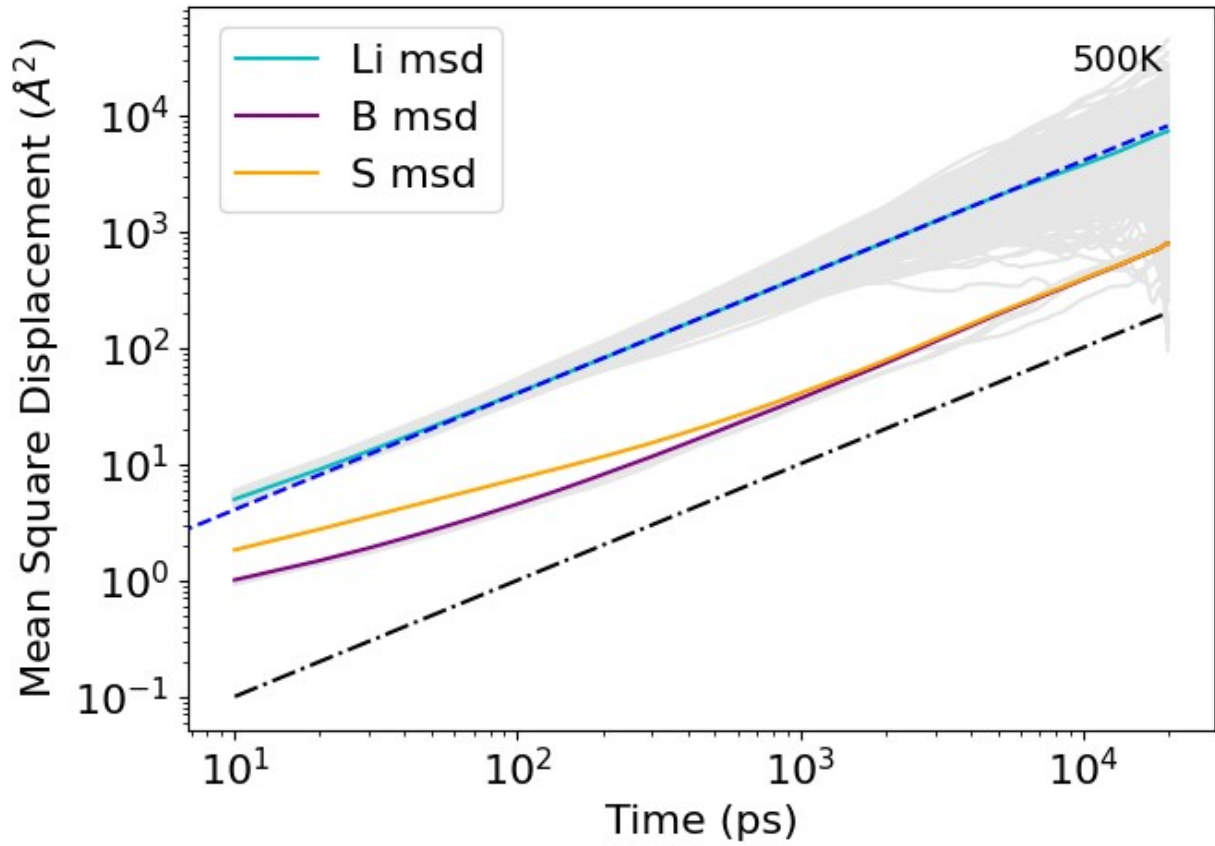



Table 8. MSD Plot of Li<sup>+</sup> Diffusion at 600K.

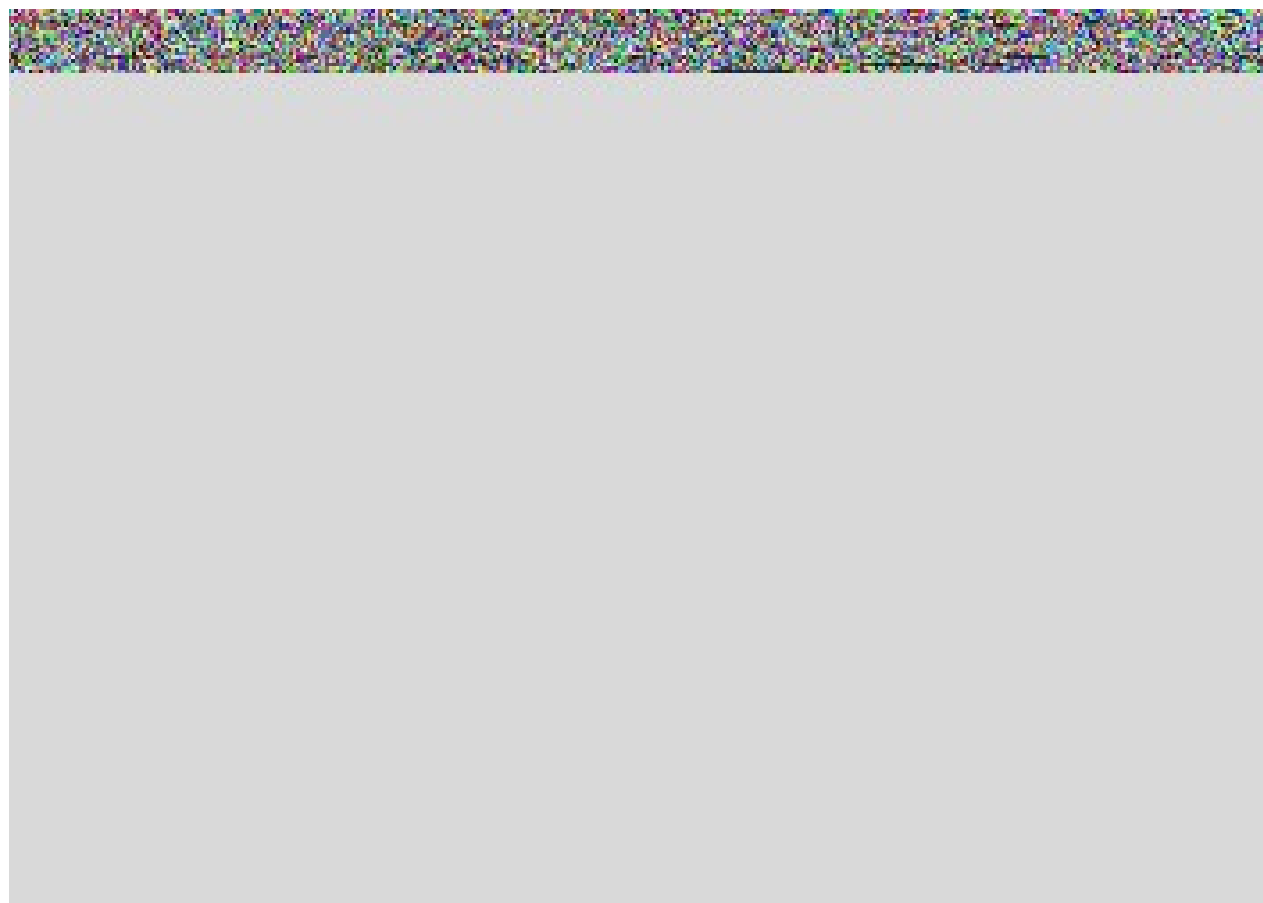

Disordered Structure at High T (600K)

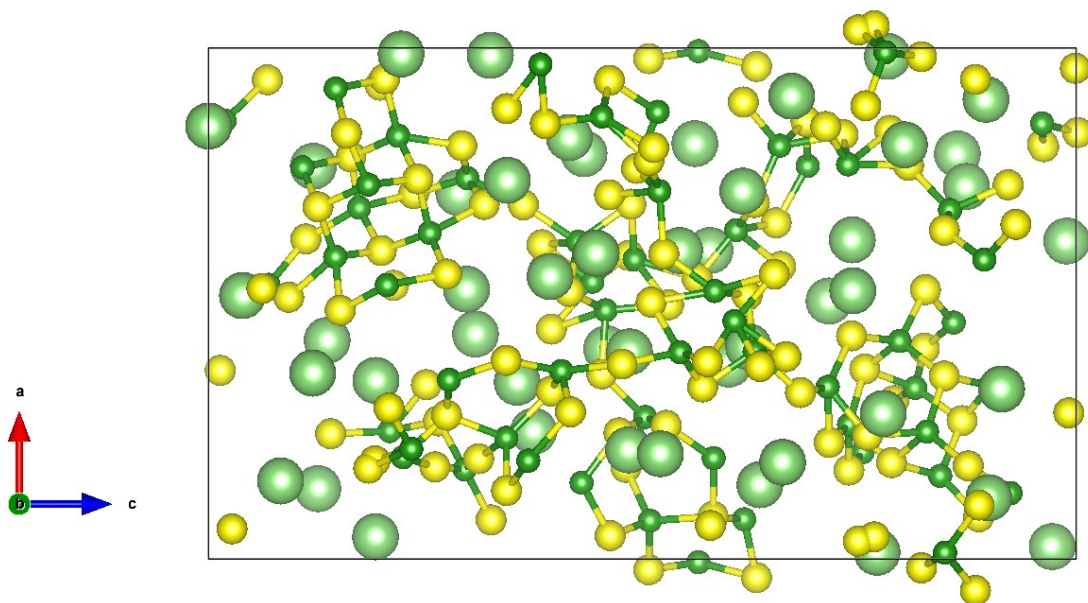

Table 9. Data File for Li3BS3 Crystal. Li charges were scaled to +.5.

Created by /net/hulk/home3/tpascal/scripts/createLammpsInput.pl on Thu May 12 13:46:48 2022

500 atoms  
216 bonds  
216 angles  
0 dihedrals  
0 impropers  
3 atom types  
1 bond types  
1 angle types  
0 dihedral types  
0 improper types  
0.000000 18.123460 xlo xhi  
0.000000 23.878760 ylo yhi  
0.000000 19.791240 zlo zhi

Masses

1 6.9410E+00 # Li  
2 1.0810E+01 # B\_2  
3 3.2060E+01 # S\_3+6

Pair Coeffs

1 0.02500000 3.20002089 # Li Li  
2 0.18000001 2.29053963 # B\_2 B\_2  
3 0.27399999 2.55088067 # S\_3+6 S\_3+6

Bond Coeffs

1 234.939 1.8557 # S\_3+6 B\_2

Angle Coeffs

1 241.304 120.00000 # S\_3+6 B\_2 S\_3+6

Atoms

1 444 1 0.50000000 3.58406 5.37550 19.72071 0 0 0  
2 444 1 0.50000000 3.58406 13.33509 9.82509 0 0 0  
3 444 1 0.50000000 3.58406 13.33509 19.72071 0 0 0  
4 444 1 0.50000000 3.58406 5.37550 9.82509 0 0 0

|    |     |   |            |          |          |          |   |   |   |
|----|-----|---|------------|----------|----------|----------|---|---|---|
| 5  | 444 | 1 | 0.50000000 | 3.58406  | 21.29468 | 19.72071 | 0 | 0 | 0 |
| 6  | 444 | 1 | 0.50000000 | 9.62522  | 5.37550  | 9.82509  | 0 | 0 | 0 |
| 7  | 444 | 1 | 0.50000000 | 9.62522  | 13.33509 | 9.82509  | 0 | 0 | 0 |
| 8  | 444 | 1 | 0.50000000 | 9.62522  | 13.33509 | 19.72071 | 0 | 0 | 0 |
| 9  | 444 | 1 | 0.50000000 | 9.62522  | 21.29468 | 9.82509  | 0 | 0 | 0 |
| 10 | 444 | 1 | 0.50000000 | 9.62522  | 21.29468 | 19.72071 | 0 | 0 | 0 |
| 11 | 444 | 1 | 0.50000000 | 15.66637 | 5.37550  | 9.82509  | 0 | 0 | 0 |
| 12 | 444 | 1 | 0.50000000 | 0.56349  | 6.56387  | 0.07053  | 0 | 0 | 0 |
| 13 | 444 | 1 | 0.50000000 | 15.66637 | 13.33509 | 19.72071 | 0 | 0 | 0 |
| 14 | 444 | 1 | 0.50000000 | 15.66637 | 21.29468 | 9.82509  | 0 | 0 | 0 |
| 15 | 444 | 1 | 0.50000000 | 15.66637 | 21.29468 | 19.72071 | 0 | 0 | 0 |
| 16 | 444 | 1 | 0.50000000 | 0.56349  | 6.56387  | 9.96615  | 0 | 0 | 0 |
| 17 | 444 | 1 | 0.50000000 | 0.56349  | 14.52346 | 0.07053  | 0 | 0 | 0 |
| 18 | 444 | 1 | 0.50000000 | 0.56349  | 14.52346 | 9.96615  | 0 | 0 | 0 |
| 19 | 444 | 1 | 0.50000000 | 0.56349  | 22.48305 | 0.07053  | 0 | 0 | 0 |
| 20 | 444 | 1 | 0.50000000 | 0.56349  | 22.48305 | 9.96615  | 0 | 0 | 0 |
| 21 | 444 | 1 | 0.50000000 | 6.60464  | 6.56387  | 0.07053  | 0 | 0 | 0 |
| 22 | 444 | 1 | 0.50000000 | 6.60464  | 6.56387  | 9.96615  | 0 | 0 | 0 |
| 23 | 444 | 1 | 0.50000000 | 6.60464  | 14.52346 | 0.07053  | 0 | 0 | 0 |
| 24 | 444 | 1 | 0.50000000 | 6.60464  | 14.52346 | 9.96615  | 0 | 0 | 0 |
| 25 | 444 | 1 | 0.50000000 | 6.60464  | 22.48305 | 0.07053  | 0 | 0 | 0 |
| 26 | 444 | 1 | 0.50000000 | 6.60464  | 22.48305 | 9.96615  | 0 | 0 | 0 |
| 27 | 444 | 1 | 0.50000000 | 12.64579 | 6.56387  | 0.07053  | 0 | 0 | 0 |
| 28 | 444 | 1 | 0.50000000 | 12.64579 | 6.56387  | 9.96615  | 0 | 0 | 0 |
| 29 | 444 | 1 | 0.50000000 | 12.64579 | 14.52346 | 0.07053  | 0 | 0 | 0 |
| 30 | 444 | 1 | 0.50000000 | 12.64579 | 14.52346 | 9.96615  | 0 | 0 | 0 |
| 31 | 444 | 1 | 0.50000000 | 12.64579 | 22.48305 | 0.07053  | 0 | 0 | 0 |
| 32 | 444 | 1 | 0.50000000 | 12.64579 | 22.48305 | 9.96615  | 0 | 0 | 0 |
| 33 | 444 | 1 | 0.50000000 | 5.47767  | 1.39571  | 5.01834  | 0 | 0 | 0 |
| 34 | 444 | 1 | 0.50000000 | 5.47767  | 1.39571  | 14.91397 | 0 | 0 | 0 |
| 35 | 444 | 1 | 0.50000000 | 5.47767  | 9.35530  | 5.01834  | 0 | 0 | 0 |
| 36 | 444 | 1 | 0.50000000 | 5.47767  | 9.35530  | 14.91397 | 0 | 0 | 0 |
| 37 | 444 | 1 | 0.50000000 | 5.47767  | 17.31488 | 5.01834  | 0 | 0 | 0 |

|    |     |   |            |          |          |          |   |   |   |
|----|-----|---|------------|----------|----------|----------|---|---|---|
| 38 | 444 | 1 | 0.50000000 | 5.47767  | 17.31488 | 14.91397 | 0 | 0 | 0 |
| 39 | 444 | 1 | 0.50000000 | 11.51882 | 1.39571  | 5.01834  | 0 | 0 | 0 |
| 40 | 444 | 1 | 0.50000000 | 11.51882 | 1.39571  | 14.91397 | 0 | 0 | 0 |
| 41 | 444 | 1 | 0.50000000 | 11.51882 | 9.35530  | 5.01834  | 0 | 0 | 0 |
| 42 | 444 | 1 | 0.50000000 | 11.51882 | 9.35530  | 14.91397 | 0 | 0 | 0 |
| 43 | 444 | 1 | 0.50000000 | 11.51882 | 17.31488 | 5.01834  | 0 | 0 | 0 |
| 44 | 444 | 1 | 0.50000000 | 11.51882 | 17.31488 | 14.91397 | 0 | 0 | 0 |
| 45 | 444 | 1 | 0.50000000 | 17.55997 | 1.39571  | 5.01834  | 0 | 0 | 0 |
| 46 | 444 | 1 | 0.50000000 | 17.55997 | 1.39571  | 14.91397 | 0 | 0 | 0 |
| 47 | 444 | 1 | 0.50000000 | 17.55997 | 9.35530  | 5.01834  | 0 | 0 | 0 |
| 48 | 444 | 1 | 0.50000000 | 17.55997 | 9.35530  | 14.91397 | 0 | 0 | 0 |
| 49 | 444 | 1 | 0.50000000 | 17.55997 | 17.31488 | 5.01834  | 0 | 0 | 0 |
| 50 | 444 | 1 | 0.50000000 | 17.55997 | 17.31488 | 14.91397 | 0 | 0 | 0 |
| 51 | 444 | 1 | 0.50000000 | 2.45709  | 2.58408  | 4.87728  | 0 | 0 | 0 |
| 52 | 444 | 1 | 0.50000000 | 2.45709  | 2.58408  | 14.77290 | 0 | 0 | 0 |
| 53 | 444 | 1 | 0.50000000 | 2.45709  | 10.54367 | 4.87728  | 0 | 0 | 0 |
| 54 | 444 | 1 | 0.50000000 | 2.45709  | 10.54367 | 14.77290 | 0 | 0 | 0 |
| 55 | 444 | 1 | 0.50000000 | 2.45709  | 18.50325 | 4.87728  | 0 | 0 | 0 |
| 56 | 444 | 1 | 0.50000000 | 2.45709  | 18.50325 | 14.77290 | 0 | 0 | 0 |
| 57 | 444 | 1 | 0.50000000 | 8.49824  | 2.58408  | 4.87728  | 0 | 0 | 0 |
| 58 | 444 | 1 | 0.50000000 | 8.49824  | 2.58408  | 14.77290 | 0 | 0 | 0 |
| 59 | 444 | 1 | 0.50000000 | 8.49824  | 10.54367 | 4.87728  | 0 | 0 | 0 |
| 60 | 444 | 1 | 0.50000000 | 8.49824  | 10.54367 | 14.77290 | 0 | 0 | 0 |
| 61 | 444 | 1 | 0.50000000 | 8.49824  | 18.50325 | 4.87728  | 0 | 0 | 0 |
| 62 | 444 | 1 | 0.50000000 | 8.49824  | 18.50325 | 14.77290 | 0 | 0 | 0 |
| 63 | 444 | 1 | 0.50000000 | 14.53940 | 2.58408  | 4.87728  | 0 | 0 | 0 |
| 64 | 444 | 1 | 0.50000000 | 14.53940 | 2.58408  | 14.77290 | 0 | 0 | 0 |
| 65 | 444 | 1 | 0.50000000 | 14.53940 | 10.54367 | 4.87728  | 0 | 0 | 0 |
| 66 | 444 | 1 | 0.50000000 | 14.53940 | 10.54367 | 14.77290 | 0 | 0 | 0 |
| 67 | 444 | 1 | 0.50000000 | 14.53940 | 18.50325 | 4.87728  | 0 | 0 | 0 |
| 68 | 444 | 1 | 0.50000000 | 14.53940 | 18.50325 | 14.77290 | 0 | 0 | 0 |
| 69 | 444 | 1 | 0.50000000 | 2.45709  | 2.58408  | 0.07053  | 0 | 0 | 0 |
| 70 | 444 | 1 | 0.50000000 | 2.45709  | 2.58408  | 9.96615  | 0 | 0 | 0 |

|     |     |   |            |          |          |          |   |   |   |
|-----|-----|---|------------|----------|----------|----------|---|---|---|
| 71  | 444 | 1 | 0.50000000 | 2.45709  | 10.54367 | 0.07053  | 0 | 0 | 0 |
| 72  | 444 | 1 | 0.50000000 | 2.45709  | 10.54367 | 9.96615  | 0 | 0 | 0 |
| 73  | 444 | 1 | 0.50000000 | 2.45709  | 18.50325 | 0.07053  | 0 | 0 | 0 |
| 74  | 444 | 1 | 0.50000000 | 2.45709  | 18.50325 | 9.96615  | 0 | 0 | 0 |
| 75  | 444 | 1 | 0.50000000 | 8.49824  | 2.58408  | 0.07053  | 0 | 0 | 0 |
| 76  | 444 | 1 | 0.50000000 | 8.49824  | 2.58408  | 9.96615  | 0 | 0 | 0 |
| 77  | 444 | 1 | 0.50000000 | 8.49824  | 10.54367 | 0.07053  | 0 | 0 | 0 |
| 78  | 444 | 1 | 0.50000000 | 8.49824  | 10.54367 | 9.96615  | 0 | 0 | 0 |
| 79  | 444 | 1 | 0.50000000 | 8.49824  | 18.50325 | 0.07053  | 0 | 0 | 0 |
| 80  | 444 | 1 | 0.50000000 | 8.49824  | 18.50325 | 9.96615  | 0 | 0 | 0 |
| 81  | 444 | 1 | 0.50000000 | 14.53940 | 2.58408  | 0.07053  | 0 | 0 | 0 |
| 82  | 444 | 1 | 0.50000000 | 14.53940 | 2.58408  | 9.96615  | 0 | 0 | 0 |
| 83  | 444 | 1 | 0.50000000 | 14.53940 | 10.54367 | 0.07053  | 0 | 0 | 0 |
| 84  | 444 | 1 | 0.50000000 | 14.53940 | 10.54367 | 9.96615  | 0 | 0 | 0 |
| 85  | 444 | 1 | 0.50000000 | 14.53940 | 18.50325 | 0.07053  | 0 | 0 | 0 |
| 86  | 444 | 1 | 0.50000000 | 14.53940 | 18.50325 | 9.96615  | 0 | 0 | 0 |
| 87  | 444 | 1 | 0.50000000 | 5.47767  | 1.39571  | 9.82509  | 0 | 0 | 0 |
| 88  | 444 | 1 | 0.50000000 | 5.47767  | 1.39571  | 19.72071 | 0 | 0 | 0 |
| 89  | 444 | 1 | 0.50000000 | 5.47767  | 9.35530  | 9.82509  | 0 | 0 | 0 |
| 90  | 444 | 1 | 0.50000000 | 5.47767  | 9.35530  | 19.72071 | 0 | 0 | 0 |
| 91  | 444 | 1 | 0.50000000 | 5.47767  | 17.31488 | 9.82509  | 0 | 0 | 0 |
| 92  | 444 | 1 | 0.50000000 | 5.47767  | 17.31488 | 19.72071 | 0 | 0 | 0 |
| 93  | 444 | 1 | 0.50000000 | 11.51882 | 1.39571  | 9.82509  | 0 | 0 | 0 |
| 94  | 444 | 1 | 0.50000000 | 11.51882 | 1.39571  | 19.72071 | 0 | 0 | 0 |
| 95  | 444 | 1 | 0.50000000 | 11.51882 | 9.35530  | 9.82509  | 0 | 0 | 0 |
| 96  | 444 | 1 | 0.50000000 | 11.51882 | 9.35530  | 19.72071 | 0 | 0 | 0 |
| 97  | 444 | 1 | 0.50000000 | 11.51882 | 17.31488 | 9.82509  | 0 | 0 | 0 |
| 98  | 444 | 1 | 0.50000000 | 11.51882 | 17.31488 | 19.72071 | 0 | 0 | 0 |
| 99  | 444 | 1 | 0.50000000 | 17.55997 | 1.39571  | 9.82509  | 0 | 0 | 0 |
| 100 | 444 | 1 | 0.50000000 | 17.55997 | 1.39571  | 19.72071 | 0 | 0 | 0 |
| 101 | 444 | 1 | 0.50000000 | 17.55997 | 9.35530  | 9.82509  | 0 | 0 | 0 |
| 102 | 444 | 1 | 0.50000000 | 17.55997 | 9.35530  | 19.72071 | 0 | 0 | 0 |
| 103 | 444 | 1 | 0.50000000 | 17.55997 | 17.31488 | 9.82509  | 0 | 0 | 0 |

|     |     |   |            |          |          |          |   |   |   |
|-----|-----|---|------------|----------|----------|----------|---|---|---|
| 104 | 444 | 1 | 0.50000000 | 17.55997 | 17.31488 | 19.72071 | 0 | 0 | 0 |
| 105 | 444 | 1 | 0.50000000 | 0.56349  | 6.56387  | 4.87728  | 0 | 0 | 0 |
| 106 | 444 | 1 | 0.50000000 | 0.56349  | 6.56387  | 14.77290 | 0 | 0 | 0 |
| 107 | 444 | 1 | 0.50000000 | 0.56349  | 14.52346 | 4.87728  | 0 | 0 | 0 |
| 108 | 444 | 1 | 0.50000000 | 0.56349  | 14.52346 | 14.77290 | 0 | 0 | 0 |
| 109 | 444 | 1 | 0.50000000 | 0.56349  | 22.48305 | 4.87728  | 0 | 0 | 0 |
| 110 | 444 | 1 | 0.50000000 | 0.56349  | 22.48305 | 14.77290 | 0 | 0 | 0 |
| 111 | 444 | 1 | 0.50000000 | 6.60464  | 6.56387  | 4.87728  | 0 | 0 | 0 |
| 112 | 444 | 1 | 0.50000000 | 6.60464  | 6.56387  | 14.77290 | 0 | 0 | 0 |
| 113 | 444 | 1 | 0.50000000 | 6.60464  | 14.52346 | 4.87728  | 0 | 0 | 0 |
| 114 | 444 | 1 | 0.50000000 | 6.60464  | 14.52346 | 14.77290 | 0 | 0 | 0 |
| 115 | 444 | 1 | 0.50000000 | 6.60464  | 22.48305 | 4.87728  | 0 | 0 | 0 |
| 116 | 444 | 1 | 0.50000000 | 6.60464  | 22.48305 | 14.77290 | 0 | 0 | 0 |
| 117 | 444 | 1 | 0.50000000 | 12.64579 | 6.56387  | 4.87728  | 0 | 0 | 0 |
| 118 | 444 | 1 | 0.50000000 | 12.64579 | 6.56387  | 14.77290 | 0 | 0 | 0 |
| 119 | 444 | 1 | 0.50000000 | 12.64579 | 14.52346 | 4.87728  | 0 | 0 | 0 |
| 120 | 444 | 1 | 0.50000000 | 12.64579 | 14.52346 | 14.77290 | 0 | 0 | 0 |
| 121 | 444 | 1 | 0.50000000 | 12.64579 | 22.48305 | 4.87728  | 0 | 0 | 0 |
| 122 | 444 | 1 | 0.50000000 | 12.64579 | 22.48305 | 14.77290 | 0 | 0 | 0 |
| 123 | 444 | 1 | 0.50000000 | 3.58406  | 5.37550  | 5.01834  | 0 | 0 | 0 |
| 124 | 444 | 1 | 0.50000000 | 3.58406  | 5.37550  | 14.91397 | 0 | 0 | 0 |
| 125 | 444 | 1 | 0.50000000 | 3.58406  | 13.33509 | 5.01834  | 0 | 0 | 0 |
| 126 | 444 | 1 | 0.50000000 | 3.58406  | 13.33509 | 14.91397 | 0 | 0 | 0 |
| 127 | 444 | 1 | 0.50000000 | 3.58406  | 21.29468 | 5.01834  | 0 | 0 | 0 |
| 128 | 444 | 1 | 0.50000000 | 3.58406  | 21.29468 | 14.91397 | 0 | 0 | 0 |
| 129 | 444 | 1 | 0.50000000 | 9.62522  | 5.37550  | 5.01834  | 0 | 0 | 0 |
| 130 | 444 | 1 | 0.50000000 | 9.62522  | 5.37550  | 14.91397 | 0 | 0 | 0 |
| 131 | 444 | 1 | 0.50000000 | 9.62522  | 13.33509 | 5.01834  | 0 | 0 | 0 |
| 132 | 444 | 1 | 0.50000000 | 9.62522  | 13.33509 | 14.91397 | 0 | 0 | 0 |
| 133 | 444 | 1 | 0.50000000 | 9.62522  | 21.29468 | 5.01834  | 0 | 0 | 0 |
| 134 | 444 | 1 | 0.50000000 | 9.62522  | 21.29468 | 14.91397 | 0 | 0 | 0 |
| 135 | 444 | 1 | 0.50000000 | 15.66637 | 5.37550  | 5.01834  | 0 | 0 | 0 |
| 136 | 444 | 1 | 0.50000000 | 15.66637 | 5.37550  | 14.91397 | 0 | 0 | 0 |

|     |     |   |            |          |          |          |   |   |   |
|-----|-----|---|------------|----------|----------|----------|---|---|---|
| 137 | 444 | 1 | 0.50000000 | 15.66637 | 13.33509 | 5.01834  | 0 | 0 | 0 |
| 138 | 444 | 1 | 0.50000000 | 15.66637 | 13.33509 | 14.91397 | 0 | 0 | 0 |
| 139 | 444 | 1 | 0.50000000 | 15.66637 | 21.29468 | 5.01834  | 0 | 0 | 0 |
| 140 | 444 | 1 | 0.50000000 | 15.66637 | 21.29468 | 14.91397 | 0 | 0 | 0 |
| 141 | 444 | 1 | 0.50000000 | 3.33629  | 7.90485  | 7.42172  | 0 | 0 | 0 |
| 142 | 444 | 1 | 0.50000000 | 3.33629  | 7.90485  | 17.31734 | 0 | 0 | 0 |
| 143 | 444 | 1 | 0.50000000 | 3.33629  | 15.86444 | 7.42172  | 0 | 0 | 0 |
| 144 | 444 | 1 | 0.50000000 | 3.33629  | 15.86444 | 17.31734 | 0 | 0 | 0 |
| 145 | 444 | 1 | 0.50000000 | 3.33629  | 23.82402 | 7.42172  | 0 | 0 | 0 |
| 146 | 444 | 1 | 0.50000000 | 3.33629  | 23.82402 | 17.31734 | 0 | 0 | 0 |
| 147 | 444 | 1 | 0.50000000 | 9.37745  | 7.90485  | 7.42172  | 0 | 0 | 0 |
| 148 | 444 | 1 | 0.50000000 | 9.37745  | 7.90485  | 17.31734 | 0 | 0 | 0 |
| 149 | 444 | 1 | 0.50000000 | 9.37745  | 15.86444 | 7.42172  | 0 | 0 | 0 |
| 150 | 444 | 1 | 0.50000000 | 9.37745  | 15.86444 | 17.31734 | 0 | 0 | 0 |
| 151 | 444 | 1 | 0.50000000 | 9.37745  | 23.82402 | 7.42172  | 0 | 0 | 0 |
| 152 | 444 | 1 | 0.50000000 | 9.37745  | 23.82402 | 17.31734 | 0 | 0 | 0 |
| 153 | 444 | 1 | 0.50000000 | 15.41860 | 7.90485  | 7.42172  | 0 | 0 | 0 |
| 154 | 444 | 1 | 0.50000000 | 15.41860 | 7.90485  | 17.31734 | 0 | 0 | 0 |
| 155 | 444 | 1 | 0.50000000 | 15.41860 | 15.86444 | 7.42172  | 0 | 0 | 0 |
| 156 | 444 | 1 | 0.50000000 | 15.41860 | 15.86444 | 17.31734 | 0 | 0 | 0 |
| 157 | 444 | 1 | 0.50000000 | 15.41860 | 23.82402 | 7.42172  | 0 | 0 | 0 |
| 158 | 444 | 1 | 0.50000000 | 15.41860 | 23.82402 | 17.31734 | 0 | 0 | 0 |
| 159 | 444 | 1 | 0.50000000 | 0.31572  | 4.03453  | 2.47391  | 0 | 0 | 0 |
| 160 | 444 | 1 | 0.50000000 | 0.31572  | 4.03453  | 12.36953 | 0 | 0 | 0 |
| 161 | 444 | 1 | 0.50000000 | 0.31572  | 11.99411 | 2.47391  | 0 | 0 | 0 |
| 162 | 444 | 1 | 0.50000000 | 0.31572  | 11.99411 | 12.36953 | 0 | 0 | 0 |
| 163 | 444 | 1 | 0.50000000 | 0.31572  | 19.95370 | 2.47391  | 0 | 0 | 0 |
| 164 | 444 | 1 | 0.50000000 | 0.31572  | 19.95370 | 12.36953 | 0 | 0 | 0 |
| 165 | 444 | 1 | 0.50000000 | 6.35687  | 4.03453  | 2.47391  | 0 | 0 | 0 |
| 166 | 444 | 1 | 0.50000000 | 6.35687  | 4.03453  | 12.36953 | 0 | 0 | 0 |
| 167 | 444 | 1 | 0.50000000 | 6.35687  | 11.99411 | 2.47391  | 0 | 0 | 0 |
| 168 | 444 | 1 | 0.50000000 | 6.35687  | 11.99411 | 12.36953 | 0 | 0 | 0 |
| 169 | 444 | 1 | 0.50000000 | 6.35687  | 19.95370 | 2.47391  | 0 | 0 | 0 |



|     |     |   |            |          |          |          |   |   |   |
|-----|-----|---|------------|----------|----------|----------|---|---|---|
| 170 | 444 | 1 | 0.50000000 | 6.35687  | 19.95370 | 12.36953 | 0 | 0 | 0 |
| 171 | 444 | 1 | 0.50000000 | 12.39802 | 4.03453  | 2.47391  | 0 | 0 | 0 |
| 172 | 444 | 1 | 0.50000000 | 12.39802 | 4.03453  | 12.36953 | 0 | 0 | 0 |
| 173 | 444 | 1 | 0.50000000 | 12.39802 | 11.99411 | 2.47391  | 0 | 0 | 0 |
| 174 | 444 | 1 | 0.50000000 | 12.39802 | 11.99411 | 12.36953 | 0 | 0 | 0 |
| 175 | 444 | 1 | 0.50000000 | 12.39802 | 19.95370 | 2.47391  | 0 | 0 | 0 |
| 176 | 444 | 1 | 0.50000000 | 12.39802 | 19.95370 | 12.36953 | 0 | 0 | 0 |
| 177 | 444 | 1 | 0.50000000 | 5.72544  | 3.92506  | 7.42172  | 0 | 0 | 0 |
| 178 | 444 | 1 | 0.50000000 | 5.72544  | 3.92506  | 17.31734 | 0 | 0 | 0 |
| 179 | 444 | 1 | 0.50000000 | 5.72544  | 11.88464 | 7.42172  | 0 | 0 | 0 |
| 180 | 444 | 1 | 0.50000000 | 5.72544  | 11.88464 | 17.31734 | 0 | 0 | 0 |
| 181 | 444 | 1 | 0.50000000 | 5.72544  | 19.84423 | 7.42172  | 0 | 0 | 0 |
| 182 | 444 | 1 | 0.50000000 | 5.72544  | 19.84423 | 17.31734 | 0 | 0 | 0 |
| 183 | 444 | 1 | 0.50000000 | 11.76659 | 3.92506  | 7.42172  | 0 | 0 | 0 |
| 184 | 444 | 1 | 0.50000000 | 11.76659 | 3.92506  | 17.31734 | 0 | 0 | 0 |
| 185 | 444 | 1 | 0.50000000 | 11.76659 | 11.88464 | 7.42172  | 0 | 0 | 0 |
| 186 | 444 | 1 | 0.50000000 | 11.76659 | 11.88464 | 17.31734 | 0 | 0 | 0 |
| 187 | 444 | 1 | 0.50000000 | 11.76659 | 19.84423 | 7.42172  | 0 | 0 | 0 |
| 188 | 444 | 1 | 0.50000000 | 11.76659 | 19.84423 | 17.31734 | 0 | 0 | 0 |
| 189 | 444 | 1 | 0.50000000 | 17.80774 | 3.92506  | 7.42172  | 0 | 0 | 0 |
| 190 | 444 | 1 | 0.50000000 | 17.80774 | 3.92506  | 17.31734 | 0 | 0 | 0 |
| 191 | 444 | 1 | 0.50000000 | 17.80774 | 11.88464 | 7.42172  | 0 | 0 | 0 |
| 192 | 444 | 1 | 0.50000000 | 17.80774 | 11.88464 | 17.31734 | 0 | 0 | 0 |
| 193 | 444 | 1 | 0.50000000 | 17.80774 | 19.84423 | 7.42172  | 0 | 0 | 0 |
| 194 | 444 | 1 | 0.50000000 | 17.80774 | 19.84423 | 17.31734 | 0 | 0 | 0 |
| 195 | 444 | 1 | 0.50000000 | 2.70486  | 0.05474  | 2.47391  | 0 | 0 | 0 |
| 196 | 444 | 1 | 0.50000000 | 2.70486  | 0.05474  | 12.36953 | 0 | 0 | 0 |
| 197 | 444 | 1 | 0.50000000 | 2.70486  | 8.01432  | 2.47391  | 0 | 0 | 0 |
| 198 | 444 | 1 | 0.50000000 | 2.70486  | 8.01432  | 12.36953 | 0 | 0 | 0 |
| 199 | 444 | 1 | 0.50000000 | 2.70486  | 15.97391 | 2.47391  | 0 | 0 | 0 |
| 200 | 444 | 1 | 0.50000000 | 2.70486  | 15.97391 | 12.36953 | 0 | 0 | 0 |
| 201 | 444 | 1 | 0.50000000 | 8.74601  | 0.05474  | 2.47391  | 0 | 0 | 0 |
| 202 | 444 | 1 | 0.50000000 | 8.74601  | 0.05474  | 12.36953 | 0 | 0 | 0 |

|     |     |   |            |          |          |          |   |   |   |
|-----|-----|---|------------|----------|----------|----------|---|---|---|
| 203 | 444 | 1 | 0.50000000 | 8.74601  | 8.01432  | 2.47391  | 0 | 0 | 0 |
| 204 | 444 | 1 | 0.50000000 | 8.74601  | 8.01432  | 12.36953 | 0 | 0 | 0 |
| 205 | 444 | 1 | 0.50000000 | 8.74601  | 15.97391 | 2.47391  | 0 | 0 | 0 |
| 206 | 444 | 1 | 0.50000000 | 8.74601  | 15.97391 | 12.36953 | 0 | 0 | 0 |
| 207 | 444 | 1 | 0.50000000 | 14.78717 | 0.05474  | 2.47391  | 0 | 0 | 0 |
| 208 | 444 | 1 | 0.50000000 | 14.78717 | 0.05474  | 12.36953 | 0 | 0 | 0 |
| 209 | 444 | 1 | 0.50000000 | 14.78717 | 8.01432  | 2.47391  | 0 | 0 | 0 |
| 210 | 444 | 1 | 0.50000000 | 14.78717 | 8.01432  | 12.36953 | 0 | 0 | 0 |
| 211 | 444 | 1 | 0.50000000 | 14.78717 | 15.97391 | 2.47391  | 0 | 0 | 0 |
| 212 | 444 | 1 | 0.50000000 | 14.78717 | 15.97391 | 12.36953 | 0 | 0 | 0 |
| 213 | 444 | 2 | 0.32142857 | 5.32390  | 7.04421  | 2.47391  | 0 | 0 | 0 |
| 214 | 444 | 2 | 0.32142857 | 5.32390  | 7.04421  | 12.36953 | 0 | 0 | 0 |
| 215 | 444 | 2 | 0.32142857 | 5.32390  | 15.00379 | 2.47391  | 0 | 0 | 0 |
| 216 | 444 | 2 | 0.32142857 | 5.32390  | 15.00379 | 12.36953 | 0 | 0 | 0 |
| 217 | 444 | 2 | 0.32142857 | 5.32390  | 22.96338 | 2.47391  | 0 | 0 | 0 |
| 218 | 444 | 2 | 0.32142857 | 5.32390  | 22.96338 | 12.36953 | 0 | 0 | 0 |
| 219 | 444 | 2 | 0.32142857 | 11.36505 | 7.04421  | 2.47391  | 0 | 0 | 0 |
| 220 | 444 | 2 | 0.32142857 | 11.36505 | 7.04421  | 12.36953 | 0 | 0 | 0 |
| 221 | 444 | 2 | 0.32142857 | 11.36505 | 15.00379 | 2.47391  | 0 | 0 | 0 |
| 222 | 444 | 2 | 0.32142857 | 11.36505 | 15.00379 | 12.36953 | 0 | 0 | 0 |
| 223 | 444 | 2 | 0.32142857 | 11.36505 | 22.96338 | 2.47391  | 0 | 0 | 0 |
| 224 | 444 | 2 | 0.32142857 | 11.36505 | 22.96338 | 12.36953 | 0 | 0 | 0 |
| 225 | 444 | 2 | 0.32142857 | 17.40620 | 7.04421  | 2.47391  | 0 | 0 | 0 |
| 226 | 444 | 2 | 0.32142857 | 17.40620 | 7.04421  | 12.36953 | 0 | 0 | 0 |
| 227 | 444 | 2 | 0.32142857 | 17.40620 | 15.00379 | 2.47391  | 0 | 0 | 0 |
| 228 | 444 | 2 | 0.32142857 | 17.40620 | 15.00379 | 12.36953 | 0 | 0 | 0 |
| 229 | 444 | 2 | 0.32142857 | 17.40620 | 22.96338 | 2.47391  | 0 | 0 | 0 |
| 230 | 444 | 2 | 0.32142857 | 17.40620 | 22.96338 | 12.36953 | 0 | 0 | 0 |
| 231 | 444 | 2 | 0.32142857 | 2.30332  | 4.89517  | 7.42172  | 0 | 0 | 0 |
| 232 | 444 | 2 | 0.32142857 | 2.30332  | 4.89517  | 17.31734 | 0 | 0 | 0 |
| 233 | 444 | 2 | 0.32142857 | 2.30332  | 12.85476 | 7.42172  | 0 | 0 | 0 |
| 234 | 444 | 2 | 0.32142857 | 2.30332  | 12.85476 | 17.31734 | 0 | 0 | 0 |
| 235 | 444 | 2 | 0.32142857 | 2.30332  | 20.81434 | 7.42172  | 0 | 0 | 0 |

|     |     |   |            |          |          |          |   |   |   |
|-----|-----|---|------------|----------|----------|----------|---|---|---|
| 236 | 444 | 2 | 0.32142857 | 2.30332  | 20.81434 | 17.31734 | 0 | 0 | 0 |
| 237 | 444 | 2 | 0.32142857 | 8.34447  | 4.89517  | 7.42172  | 0 | 0 | 0 |
| 238 | 444 | 2 | 0.32142857 | 8.34447  | 4.89517  | 17.31734 | 0 | 0 | 0 |
| 239 | 444 | 2 | 0.32142857 | 8.34447  | 12.85476 | 7.42172  | 0 | 0 | 0 |
| 240 | 444 | 2 | 0.32142857 | 8.34447  | 12.85476 | 17.31734 | 0 | 0 | 0 |
| 241 | 444 | 2 | 0.32142857 | 8.34447  | 20.81434 | 7.42172  | 0 | 0 | 0 |
| 242 | 444 | 2 | 0.32142857 | 8.34447  | 20.81434 | 17.31734 | 0 | 0 | 0 |
| 243 | 444 | 2 | 0.32142857 | 14.38563 | 4.89517  | 7.42172  | 0 | 0 | 0 |
| 244 | 444 | 2 | 0.32142857 | 14.38563 | 4.89517  | 17.31734 | 0 | 0 | 0 |
| 245 | 444 | 2 | 0.32142857 | 14.38563 | 12.85476 | 7.42172  | 0 | 0 | 0 |
| 246 | 444 | 2 | 0.32142857 | 14.38563 | 12.85476 | 17.31734 | 0 | 0 | 0 |
| 247 | 444 | 2 | 0.32142857 | 14.38563 | 20.81434 | 7.42172  | 0 | 0 | 0 |
| 248 | 444 | 2 | 0.32142857 | 14.38563 | 20.81434 | 17.31734 | 0 | 0 | 0 |
| 249 | 444 | 2 | 0.32142857 | 3.73783  | 3.06441  | 2.47391  | 0 | 0 | 0 |
| 250 | 444 | 2 | 0.32142857 | 3.73783  | 3.06441  | 12.36953 | 0 | 0 | 0 |
| 251 | 444 | 2 | 0.32142857 | 3.73783  | 11.02400 | 2.47391  | 0 | 0 | 0 |
| 252 | 444 | 2 | 0.32142857 | 3.73783  | 11.02400 | 12.36953 | 0 | 0 | 0 |
| 253 | 444 | 2 | 0.32142857 | 3.73783  | 18.98359 | 2.47391  | 0 | 0 | 0 |
| 254 | 444 | 2 | 0.32142857 | 3.73783  | 18.98359 | 12.36953 | 0 | 0 | 0 |
| 255 | 444 | 2 | 0.32142857 | 9.77898  | 3.06441  | 2.47391  | 0 | 0 | 0 |
| 256 | 444 | 2 | 0.32142857 | 9.77898  | 3.06441  | 12.36953 | 0 | 0 | 0 |
| 257 | 444 | 2 | 0.32142857 | 9.77898  | 11.02400 | 2.47391  | 0 | 0 | 0 |
| 258 | 444 | 2 | 0.32142857 | 9.77898  | 11.02400 | 12.36953 | 0 | 0 | 0 |
| 259 | 444 | 2 | 0.32142857 | 9.77898  | 18.98359 | 2.47391  | 0 | 0 | 0 |
| 260 | 444 | 2 | 0.32142857 | 9.77898  | 18.98359 | 12.36953 | 0 | 0 | 0 |
| 261 | 444 | 2 | 0.32142857 | 15.82014 | 3.06441  | 2.47391  | 0 | 0 | 0 |
| 262 | 444 | 2 | 0.32142857 | 15.82014 | 3.06441  | 12.36953 | 0 | 0 | 0 |
| 263 | 444 | 2 | 0.32142857 | 15.82014 | 11.02400 | 2.47391  | 0 | 0 | 0 |
| 264 | 444 | 2 | 0.32142857 | 15.82014 | 11.02400 | 12.36953 | 0 | 0 | 0 |
| 265 | 444 | 2 | 0.32142857 | 15.82014 | 18.98359 | 2.47391  | 0 | 0 | 0 |
| 266 | 444 | 2 | 0.32142857 | 15.82014 | 18.98359 | 12.36953 | 0 | 0 | 0 |
| 267 | 444 | 2 | 0.32142857 | 0.71725  | 0.91538  | 7.42172  | 0 | 0 | 0 |
| 268 | 444 | 2 | 0.32142857 | 0.71725  | 0.91538  | 17.31734 | 0 | 0 | 0 |

|     |     |   |             |          |          |          |   |   |   |
|-----|-----|---|-------------|----------|----------|----------|---|---|---|
| 269 | 444 | 2 | 0.32142857  | 0.71725  | 8.87496  | 7.42172  | 0 | 0 | 0 |
| 270 | 444 | 2 | 0.32142857  | 0.71725  | 8.87496  | 17.31734 | 0 | 0 | 0 |
| 271 | 444 | 2 | 0.32142857  | 0.71725  | 16.83455 | 7.42172  | 0 | 0 | 0 |
| 272 | 444 | 2 | 0.32142857  | 0.71725  | 16.83455 | 17.31734 | 0 | 0 | 0 |
| 273 | 444 | 2 | 0.32142857  | 6.75841  | 0.91538  | 7.42172  | 0 | 0 | 0 |
| 274 | 444 | 2 | 0.32142857  | 6.75841  | 0.91538  | 17.31734 | 0 | 0 | 0 |
| 275 | 444 | 2 | 0.32142857  | 6.75841  | 8.87496  | 7.42172  | 0 | 0 | 0 |
| 276 | 444 | 2 | 0.32142857  | 6.75841  | 8.87496  | 17.31734 | 0 | 0 | 0 |
| 277 | 444 | 2 | 0.32142857  | 6.75841  | 16.83455 | 7.42172  | 0 | 0 | 0 |
| 278 | 444 | 2 | 0.32142857  | 6.75841  | 16.83455 | 17.31734 | 0 | 0 | 0 |
| 279 | 444 | 2 | 0.32142857  | 12.79956 | 0.91538  | 7.42172  | 0 | 0 | 0 |
| 280 | 444 | 2 | 0.32142857  | 12.79956 | 0.91538  | 17.31734 | 0 | 0 | 0 |
| 281 | 444 | 2 | 0.32142857  | 12.79956 | 8.87496  | 7.42172  | 0 | 0 | 0 |
| 282 | 444 | 2 | 0.32142857  | 12.79956 | 8.87496  | 17.31734 | 0 | 0 | 0 |
| 283 | 444 | 2 | 0.32142857  | 12.79956 | 16.83455 | 7.42172  | 0 | 0 | 0 |
| 284 | 444 | 2 | 0.32142857  | 12.79956 | 16.83455 | 17.31734 | 0 | 0 | 0 |
| 285 | 444 | 3 | -0.60714286 | 4.45319  | 7.39179  | 0.90526  | 0 | 0 | 0 |
| 286 | 444 | 3 | -0.60714286 | 4.45319  | 7.39179  | 10.80088 | 0 | 0 | 0 |
| 287 | 444 | 3 | -0.60714286 | 4.45319  | 15.35138 | 0.90526  | 0 | 0 | 0 |
| 288 | 444 | 3 | -0.60714286 | 4.45319  | 15.35138 | 10.80088 | 0 | 0 | 0 |
| 289 | 444 | 3 | -0.60714286 | 4.45319  | 23.31097 | 0.90526  | 0 | 0 | 0 |
| 290 | 444 | 3 | -0.60714286 | 4.45319  | 23.31097 | 10.80088 | 0 | 0 | 0 |
| 291 | 444 | 3 | -0.60714286 | 10.49434 | 7.39179  | 0.90526  | 0 | 0 | 0 |
| 292 | 444 | 3 | -0.60714286 | 10.49434 | 7.39179  | 10.80088 | 0 | 0 | 0 |
| 293 | 444 | 3 | -0.60714286 | 10.49434 | 15.35138 | 0.90526  | 0 | 0 | 0 |
| 294 | 444 | 3 | -0.60714286 | 10.49434 | 15.35138 | 10.80088 | 0 | 0 | 0 |
| 295 | 444 | 3 | -0.60714286 | 10.49434 | 23.31097 | 0.90526  | 0 | 0 | 0 |
| 296 | 444 | 3 | -0.60714286 | 10.49434 | 23.31097 | 10.80088 | 0 | 0 | 0 |
| 297 | 444 | 3 | -0.60714286 | 16.53549 | 7.39179  | 0.90526  | 0 | 0 | 0 |
| 298 | 444 | 3 | -0.60714286 | 16.53549 | 7.39179  | 10.80088 | 0 | 0 | 0 |
| 299 | 444 | 3 | -0.60714286 | 16.53549 | 15.35138 | 0.90526  | 0 | 0 | 0 |
| 300 | 444 | 3 | -0.60714286 | 16.53549 | 15.35138 | 10.80088 | 0 | 0 | 0 |
| 301 | 444 | 3 | -0.60714286 | 16.53549 | 23.31097 | 0.90526  | 0 | 0 | 0 |

|     |     |   |             |          |          |          |   |   |   |
|-----|-----|---|-------------|----------|----------|----------|---|---|---|
| 302 | 444 | 3 | -0.60714286 | 16.53549 | 23.31097 | 10.80088 | 0 | 0 | 0 |
| 303 | 444 | 3 | -0.60714286 | 1.43261  | 4.54758  | 8.99036  | 0 | 0 | 0 |
| 304 | 444 | 3 | -0.60714286 | 1.43261  | 4.54758  | 18.88598 | 0 | 0 | 0 |
| 305 | 444 | 3 | -0.60714286 | 1.43261  | 12.50717 | 8.99036  | 0 | 0 | 0 |
| 306 | 444 | 3 | -0.60714286 | 1.43261  | 12.50717 | 18.88598 | 0 | 0 | 0 |
| 307 | 444 | 3 | -0.60714286 | 1.43261  | 20.46676 | 8.99036  | 0 | 0 | 0 |
| 308 | 444 | 3 | -0.60714286 | 1.43261  | 20.46676 | 18.88598 | 0 | 0 | 0 |
| 309 | 444 | 3 | -0.60714286 | 7.47376  | 4.54758  | 8.99036  | 0 | 0 | 0 |
| 310 | 444 | 3 | -0.60714286 | 7.47376  | 4.54758  | 18.88598 | 0 | 0 | 0 |
| 311 | 444 | 3 | -0.60714286 | 7.47376  | 12.50717 | 8.99036  | 0 | 0 | 0 |
| 312 | 444 | 3 | -0.60714286 | 7.47376  | 12.50717 | 18.88598 | 0 | 0 | 0 |
| 313 | 444 | 3 | -0.60714286 | 7.47376  | 20.46676 | 8.99036  | 0 | 0 | 0 |
| 314 | 444 | 3 | -0.60714286 | 7.47376  | 20.46676 | 18.88598 | 0 | 0 | 0 |
| 315 | 444 | 3 | -0.60714286 | 13.51492 | 4.54758  | 8.99036  | 0 | 0 | 0 |
| 316 | 444 | 3 | -0.60714286 | 13.51492 | 4.54758  | 18.88598 | 0 | 0 | 0 |
| 317 | 444 | 3 | -0.60714286 | 13.51492 | 12.50717 | 8.99036  | 0 | 0 | 0 |
| 318 | 444 | 3 | -0.60714286 | 13.51492 | 12.50717 | 18.88598 | 0 | 0 | 0 |
| 319 | 444 | 3 | -0.60714286 | 13.51492 | 20.46676 | 8.99036  | 0 | 0 | 0 |
| 320 | 444 | 3 | -0.60714286 | 13.51492 | 20.46676 | 18.88598 | 0 | 0 | 0 |
| 321 | 444 | 3 | -0.60714286 | 4.60854  | 3.41200  | 4.04255  | 0 | 0 | 0 |
| 322 | 444 | 3 | -0.60714286 | 4.60854  | 3.41200  | 13.93817 | 0 | 0 | 0 |
| 323 | 444 | 3 | -0.60714286 | 4.60854  | 11.37159 | 4.04255  | 0 | 0 | 0 |
| 324 | 444 | 3 | -0.60714286 | 4.60854  | 11.37159 | 13.93817 | 0 | 0 | 0 |
| 325 | 444 | 3 | -0.60714286 | 4.60854  | 19.33117 | 4.04255  | 0 | 0 | 0 |
| 326 | 444 | 3 | -0.60714286 | 4.60854  | 19.33117 | 13.93817 | 0 | 0 | 0 |
| 327 | 444 | 3 | -0.60714286 | 10.64970 | 3.41200  | 4.04255  | 0 | 0 | 0 |
| 328 | 444 | 3 | -0.60714286 | 10.64970 | 3.41200  | 13.93817 | 0 | 0 | 0 |
| 329 | 444 | 3 | -0.60714286 | 10.64970 | 11.37159 | 4.04255  | 0 | 0 | 0 |
| 330 | 444 | 3 | -0.60714286 | 10.64970 | 11.37159 | 13.93817 | 0 | 0 | 0 |
| 331 | 444 | 3 | -0.60714286 | 10.64970 | 19.33117 | 4.04255  | 0 | 0 | 0 |
| 332 | 444 | 3 | -0.60714286 | 10.64970 | 19.33117 | 13.93817 | 0 | 0 | 0 |
| 333 | 444 | 3 | -0.60714286 | 16.69085 | 3.41200  | 4.04255  | 0 | 0 | 0 |
| 334 | 444 | 3 | -0.60714286 | 16.69085 | 3.41200  | 13.93817 | 0 | 0 | 0 |

|     |     |   |             |          |          |          |   |   |   |
|-----|-----|---|-------------|----------|----------|----------|---|---|---|
| 335 | 444 | 3 | -0.60714286 | 16.69085 | 11.37159 | 4.04255  | 0 | 0 | 0 |
| 336 | 444 | 3 | -0.60714286 | 16.69085 | 11.37159 | 13.93817 | 0 | 0 | 0 |
| 337 | 444 | 3 | -0.60714286 | 16.69085 | 19.33117 | 4.04255  | 0 | 0 | 0 |
| 338 | 444 | 3 | -0.60714286 | 16.69085 | 19.33117 | 13.93817 | 0 | 0 | 0 |
| 339 | 444 | 3 | -0.60714286 | 1.58797  | 0.56779  | 5.85307  | 0 | 0 | 0 |
| 340 | 444 | 3 | -0.60714286 | 1.58797  | 0.56779  | 15.74869 | 0 | 0 | 0 |
| 341 | 444 | 3 | -0.60714286 | 1.58797  | 8.52738  | 5.85307  | 0 | 0 | 0 |
| 342 | 444 | 3 | -0.60714286 | 1.58797  | 8.52738  | 15.74869 | 0 | 0 | 0 |
| 343 | 444 | 3 | -0.60714286 | 1.58797  | 16.48696 | 5.85307  | 0 | 0 | 0 |
| 344 | 444 | 3 | -0.60714286 | 1.58797  | 16.48696 | 15.74869 | 0 | 0 | 0 |
| 345 | 444 | 3 | -0.60714286 | 7.62912  | 0.56779  | 5.85307  | 0 | 0 | 0 |
| 346 | 444 | 3 | -0.60714286 | 7.62912  | 0.56779  | 15.74869 | 0 | 0 | 0 |
| 347 | 444 | 3 | -0.60714286 | 7.62912  | 8.52738  | 5.85307  | 0 | 0 | 0 |
| 348 | 444 | 3 | -0.60714286 | 7.62912  | 8.52738  | 15.74869 | 0 | 0 | 0 |
| 349 | 444 | 3 | -0.60714286 | 7.62912  | 16.48696 | 5.85307  | 0 | 0 | 0 |
| 350 | 444 | 3 | -0.60714286 | 7.62912  | 16.48696 | 15.74869 | 0 | 0 | 0 |
| 351 | 444 | 3 | -0.60714286 | 13.67027 | 0.56779  | 5.85307  | 0 | 0 | 0 |
| 352 | 444 | 3 | -0.60714286 | 13.67027 | 0.56779  | 15.74869 | 0 | 0 | 0 |
| 353 | 444 | 3 | -0.60714286 | 13.67027 | 8.52738  | 5.85307  | 0 | 0 | 0 |
| 354 | 444 | 3 | -0.60714286 | 13.67027 | 8.52738  | 15.74869 | 0 | 0 | 0 |
| 355 | 444 | 3 | -0.60714286 | 13.67027 | 16.48696 | 5.85307  | 0 | 0 | 0 |
| 356 | 444 | 3 | -0.60714286 | 13.67027 | 16.48696 | 15.74869 | 0 | 0 | 0 |
| 357 | 444 | 3 | -0.60714286 | 1.58797  | 0.56779  | 8.99036  | 0 | 0 | 0 |
| 358 | 444 | 3 | -0.60714286 | 1.58797  | 0.56779  | 18.88598 | 0 | 0 | 0 |
| 359 | 444 | 3 | -0.60714286 | 1.58797  | 8.52738  | 8.99036  | 0 | 0 | 0 |
| 360 | 444 | 3 | -0.60714286 | 1.58797  | 8.52738  | 18.88598 | 0 | 0 | 0 |
| 361 | 444 | 3 | -0.60714286 | 1.58797  | 16.48696 | 8.99036  | 0 | 0 | 0 |
| 362 | 444 | 3 | -0.60714286 | 1.58797  | 16.48696 | 18.88598 | 0 | 0 | 0 |
| 363 | 444 | 3 | -0.60714286 | 7.62912  | 0.56779  | 8.99036  | 0 | 0 | 0 |
| 364 | 444 | 3 | -0.60714286 | 7.62912  | 0.56779  | 18.88598 | 0 | 0 | 0 |
| 365 | 444 | 3 | -0.60714286 | 7.62912  | 8.52738  | 8.99036  | 0 | 0 | 0 |
| 366 | 444 | 3 | -0.60714286 | 7.62912  | 8.52738  | 18.88598 | 0 | 0 | 0 |
| 367 | 444 | 3 | -0.60714286 | 7.62912  | 16.48696 | 8.99036  | 0 | 0 | 0 |

|     |     |   |             |          |          |          |   |   |   |
|-----|-----|---|-------------|----------|----------|----------|---|---|---|
| 368 | 444 | 3 | -0.60714286 | 7.62912  | 16.48696 | 18.88598 | 0 | 0 | 0 |
| 369 | 444 | 3 | -0.60714286 | 13.67027 | 0.56779  | 8.99036  | 0 | 0 | 0 |
| 370 | 444 | 3 | -0.60714286 | 13.67027 | 0.56779  | 18.88598 | 0 | 0 | 0 |
| 371 | 444 | 3 | -0.60714286 | 13.67027 | 8.52738  | 8.99036  | 0 | 0 | 0 |
| 372 | 444 | 3 | -0.60714286 | 13.67027 | 8.52738  | 18.88598 | 0 | 0 | 0 |
| 373 | 444 | 3 | -0.60714286 | 13.67027 | 16.48696 | 8.99036  | 0 | 0 | 0 |
| 374 | 444 | 3 | -0.60714286 | 13.67027 | 16.48696 | 18.88598 | 0 | 0 | 0 |
| 375 | 444 | 3 | -0.60714286 | 4.60854  | 3.41200  | 0.90526  | 0 | 0 | 0 |
| 376 | 444 | 3 | -0.60714286 | 4.60854  | 3.41200  | 10.80088 | 0 | 0 | 0 |
| 377 | 444 | 3 | -0.60714286 | 4.60854  | 11.37159 | 0.90526  | 0 | 0 | 0 |
| 378 | 444 | 3 | -0.60714286 | 4.60854  | 11.37159 | 10.80088 | 0 | 0 | 0 |
| 379 | 444 | 3 | -0.60714286 | 4.60854  | 19.33117 | 0.90526  | 0 | 0 | 0 |
| 380 | 444 | 3 | -0.60714286 | 4.60854  | 19.33117 | 10.80088 | 0 | 0 | 0 |
| 381 | 444 | 3 | -0.60714286 | 10.64970 | 3.41200  | 0.90526  | 0 | 0 | 0 |
| 382 | 444 | 3 | -0.60714286 | 10.64970 | 3.41200  | 10.80088 | 0 | 0 | 0 |
| 383 | 444 | 3 | -0.60714286 | 10.64970 | 11.37159 | 0.90526  | 0 | 0 | 0 |
| 384 | 444 | 3 | -0.60714286 | 10.64970 | 11.37159 | 10.80088 | 0 | 0 | 0 |
| 385 | 444 | 3 | -0.60714286 | 10.64970 | 19.33117 | 0.90526  | 0 | 0 | 0 |
| 386 | 444 | 3 | -0.60714286 | 10.64970 | 19.33117 | 10.80088 | 0 | 0 | 0 |
| 387 | 444 | 3 | -0.60714286 | 16.69085 | 3.41200  | 0.90526  | 0 | 0 | 0 |
| 388 | 444 | 3 | -0.60714286 | 16.69085 | 3.41200  | 10.80088 | 0 | 0 | 0 |
| 389 | 444 | 3 | -0.60714286 | 16.69085 | 11.37159 | 0.90526  | 0 | 0 | 0 |
| 390 | 444 | 3 | -0.60714286 | 16.69085 | 11.37159 | 10.80088 | 0 | 0 | 0 |
| 391 | 444 | 3 | -0.60714286 | 16.69085 | 19.33117 | 0.90526  | 0 | 0 | 0 |
| 392 | 444 | 3 | -0.60714286 | 16.69085 | 19.33117 | 10.80088 | 0 | 0 | 0 |
| 393 | 444 | 3 | -0.60714286 | 1.43261  | 4.54758  | 5.85307  | 0 | 0 | 0 |
| 394 | 444 | 3 | -0.60714286 | 1.43261  | 4.54758  | 15.74869 | 0 | 0 | 0 |
| 395 | 444 | 3 | -0.60714286 | 1.43261  | 12.50717 | 5.85307  | 0 | 0 | 0 |
| 396 | 444 | 3 | -0.60714286 | 1.43261  | 12.50717 | 15.74869 | 0 | 0 | 0 |
| 397 | 444 | 3 | -0.60714286 | 1.43261  | 20.46676 | 5.85307  | 0 | 0 | 0 |
| 398 | 444 | 3 | -0.60714286 | 1.43261  | 20.46676 | 15.74869 | 0 | 0 | 0 |
| 399 | 444 | 3 | -0.60714286 | 7.47376  | 4.54758  | 5.85307  | 0 | 0 | 0 |
| 400 | 444 | 3 | -0.60714286 | 7.47376  | 4.54758  | 15.74869 | 0 | 0 | 0 |

|     |     |   |             |          |          |          |   |   |   |
|-----|-----|---|-------------|----------|----------|----------|---|---|---|
| 401 | 444 | 3 | -0.60714286 | 7.47376  | 12.50717 | 5.85307  | 0 | 0 | 0 |
| 402 | 444 | 3 | -0.60714286 | 7.47376  | 12.50717 | 15.74869 | 0 | 0 | 0 |
| 403 | 444 | 3 | -0.60714286 | 7.47376  | 20.46676 | 5.85307  | 0 | 0 | 0 |
| 404 | 444 | 3 | -0.60714286 | 7.47376  | 20.46676 | 15.74869 | 0 | 0 | 0 |
| 405 | 444 | 3 | -0.60714286 | 13.51492 | 4.54758  | 5.85307  | 0 | 0 | 0 |
| 406 | 444 | 3 | -0.60714286 | 13.51492 | 4.54758  | 15.74869 | 0 | 0 | 0 |
| 407 | 444 | 3 | -0.60714286 | 13.51492 | 12.50717 | 5.85307  | 0 | 0 | 0 |
| 408 | 444 | 3 | -0.60714286 | 13.51492 | 12.50717 | 15.74869 | 0 | 0 | 0 |
| 409 | 444 | 3 | -0.60714286 | 13.51492 | 20.46676 | 5.85307  | 0 | 0 | 0 |
| 410 | 444 | 3 | -0.60714286 | 13.51492 | 20.46676 | 15.74869 | 0 | 0 | 0 |
| 411 | 444 | 3 | -0.60714286 | 4.45319  | 7.39179  | 4.04255  | 0 | 0 | 0 |
| 412 | 444 | 3 | -0.60714286 | 4.45319  | 7.39179  | 13.93817 | 0 | 0 | 0 |
| 413 | 444 | 3 | -0.60714286 | 4.45319  | 15.35138 | 4.04255  | 0 | 0 | 0 |
| 414 | 444 | 3 | -0.60714286 | 4.45319  | 15.35138 | 13.93817 | 0 | 0 | 0 |
| 415 | 444 | 3 | -0.60714286 | 4.45319  | 23.31097 | 4.04255  | 0 | 0 | 0 |
| 416 | 444 | 3 | -0.60714286 | 4.45319  | 23.31097 | 13.93817 | 0 | 0 | 0 |
| 417 | 444 | 3 | -0.60714286 | 10.49434 | 7.39179  | 4.04255  | 0 | 0 | 0 |
| 418 | 444 | 3 | -0.60714286 | 10.49434 | 7.39179  | 13.93817 | 0 | 0 | 0 |
| 419 | 444 | 3 | -0.60714286 | 10.49434 | 15.35138 | 4.04255  | 0 | 0 | 0 |
| 420 | 444 | 3 | -0.60714286 | 10.49434 | 15.35138 | 13.93817 | 0 | 0 | 0 |
| 421 | 444 | 3 | -0.60714286 | 10.49434 | 23.31097 | 4.04255  | 0 | 0 | 0 |
| 422 | 444 | 3 | -0.60714286 | 10.49434 | 23.31097 | 13.93817 | 0 | 0 | 0 |
| 423 | 444 | 3 | -0.60714286 | 16.53549 | 7.39179  | 4.04255  | 0 | 0 | 0 |
| 424 | 444 | 3 | -0.60714286 | 16.53549 | 7.39179  | 13.93817 | 0 | 0 | 0 |
| 425 | 444 | 3 | -0.60714286 | 16.53549 | 15.35138 | 4.04255  | 0 | 0 | 0 |
| 426 | 444 | 3 | -0.60714286 | 16.53549 | 15.35138 | 13.93817 | 0 | 0 | 0 |
| 427 | 444 | 3 | -0.60714286 | 16.53549 | 23.31097 | 4.04255  | 0 | 0 | 0 |
| 428 | 444 | 3 | -0.60714286 | 16.53549 | 23.31097 | 13.93817 | 0 | 0 | 0 |
| 429 | 444 | 3 | -0.60714286 | 5.06558  | 1.61201  | 7.42172  | 0 | 0 | 0 |
| 430 | 444 | 3 | -0.60714286 | 5.06558  | 1.61201  | 17.31734 | 0 | 0 | 0 |
| 431 | 444 | 3 | -0.60714286 | 5.06558  | 9.57160  | 7.42172  | 0 | 0 | 0 |
| 432 | 444 | 3 | -0.60714286 | 5.06558  | 9.57160  | 17.31734 | 0 | 0 | 0 |
| 433 | 444 | 3 | -0.60714286 | 5.06558  | 17.53119 | 7.42172  | 0 | 0 | 0 |



|     |     |   |             |          |          |          |   |   |   |
|-----|-----|---|-------------|----------|----------|----------|---|---|---|
| 434 | 444 | 3 | -0.60714286 | 5.06558  | 17.53119 | 17.31734 | 0 | 0 | 0 |
| 435 | 444 | 3 | -0.60714286 | 11.10673 | 1.61201  | 7.42172  | 0 | 0 | 0 |
| 436 | 444 | 3 | -0.60714286 | 11.10673 | 1.61201  | 17.31734 | 0 | 0 | 0 |
| 437 | 444 | 3 | -0.60714286 | 11.10673 | 9.57160  | 7.42172  | 0 | 0 | 0 |
| 438 | 444 | 3 | -0.60714286 | 11.10673 | 9.57160  | 17.31734 | 0 | 0 | 0 |
| 439 | 444 | 3 | -0.60714286 | 11.10673 | 17.53119 | 7.42172  | 0 | 0 | 0 |
| 440 | 444 | 3 | -0.60714286 | 11.10673 | 17.53119 | 17.31734 | 0 | 0 | 0 |
| 441 | 444 | 3 | -0.60714286 | 17.14789 | 1.61201  | 7.42172  | 0 | 0 | 0 |
| 442 | 444 | 3 | -0.60714286 | 17.14789 | 1.61201  | 17.31734 | 0 | 0 | 0 |
| 443 | 444 | 3 | -0.60714286 | 17.14789 | 9.57160  | 7.42172  | 0 | 0 | 0 |
| 444 | 444 | 3 | -0.60714286 | 17.14789 | 9.57160  | 17.31734 | 0 | 0 | 0 |
| 445 | 444 | 3 | -0.60714286 | 17.14789 | 17.53119 | 7.42172  | 0 | 0 | 0 |
| 446 | 444 | 3 | -0.60714286 | 17.14789 | 17.53119 | 17.31734 | 0 | 0 | 0 |
| 447 | 444 | 3 | -0.60714286 | 2.04500  | 2.36778  | 2.47391  | 0 | 0 | 0 |
| 448 | 444 | 3 | -0.60714286 | 2.04500  | 2.36778  | 12.36953 | 0 | 0 | 0 |
| 449 | 444 | 3 | -0.60714286 | 2.04500  | 10.32736 | 2.47391  | 0 | 0 | 0 |
| 450 | 444 | 3 | -0.60714286 | 2.04500  | 10.32736 | 12.36953 | 0 | 0 | 0 |
| 451 | 444 | 3 | -0.60714286 | 2.04500  | 18.28695 | 2.47391  | 0 | 0 | 0 |
| 452 | 444 | 3 | -0.60714286 | 2.04500  | 18.28695 | 12.36953 | 0 | 0 | 0 |
| 453 | 444 | 3 | -0.60714286 | 8.08616  | 2.36778  | 2.47391  | 0 | 0 | 0 |
| 454 | 444 | 3 | -0.60714286 | 8.08616  | 2.36778  | 12.36953 | 0 | 0 | 0 |
| 455 | 444 | 3 | -0.60714286 | 8.08616  | 10.32736 | 2.47391  | 0 | 0 | 0 |
| 456 | 444 | 3 | -0.60714286 | 8.08616  | 10.32736 | 12.36953 | 0 | 0 | 0 |
| 457 | 444 | 3 | -0.60714286 | 8.08616  | 18.28695 | 2.47391  | 0 | 0 | 0 |
| 458 | 444 | 3 | -0.60714286 | 8.08616  | 18.28695 | 12.36953 | 0 | 0 | 0 |
| 459 | 444 | 3 | -0.60714286 | 14.12731 | 2.36778  | 2.47391  | 0 | 0 | 0 |
| 460 | 444 | 3 | -0.60714286 | 14.12731 | 2.36778  | 12.36953 | 0 | 0 | 0 |
| 461 | 444 | 3 | -0.60714286 | 14.12731 | 10.32736 | 2.47391  | 0 | 0 | 0 |
| 462 | 444 | 3 | -0.60714286 | 14.12731 | 10.32736 | 12.36953 | 0 | 0 | 0 |
| 463 | 444 | 3 | -0.60714286 | 14.12731 | 18.28695 | 2.47391  | 0 | 0 | 0 |
| 464 | 444 | 3 | -0.60714286 | 14.12731 | 18.28695 | 12.36953 | 0 | 0 | 0 |
| 465 | 444 | 3 | -0.60714286 | 3.99615  | 5.59181  | 7.42172  | 0 | 0 | 0 |
| 466 | 444 | 3 | -0.60714286 | 3.99615  | 5.59181  | 17.31734 | 0 | 0 | 0 |

|     |     |   |             |          |          |          |   |   |   |
|-----|-----|---|-------------|----------|----------|----------|---|---|---|
| 467 | 444 | 3 | -0.60714286 | 3.99615  | 13.55139 | 7.42172  | 0 | 0 | 0 |
| 468 | 444 | 3 | -0.60714286 | 3.99615  | 13.55139 | 17.31734 | 0 | 0 | 0 |
| 469 | 444 | 3 | -0.60714286 | 3.99615  | 21.51098 | 7.42172  | 0 | 0 | 0 |
| 470 | 444 | 3 | -0.60714286 | 3.99615  | 21.51098 | 17.31734 | 0 | 0 | 0 |
| 471 | 444 | 3 | -0.60714286 | 10.03730 | 5.59181  | 7.42172  | 0 | 0 | 0 |
| 472 | 444 | 3 | -0.60714286 | 10.03730 | 5.59181  | 17.31734 | 0 | 0 | 0 |
| 473 | 444 | 3 | -0.60714286 | 10.03730 | 13.55139 | 7.42172  | 0 | 0 | 0 |
| 474 | 444 | 3 | -0.60714286 | 10.03730 | 13.55139 | 17.31734 | 0 | 0 | 0 |
| 475 | 444 | 3 | -0.60714286 | 10.03730 | 21.51098 | 7.42172  | 0 | 0 | 0 |
| 476 | 444 | 3 | -0.60714286 | 10.03730 | 21.51098 | 17.31734 | 0 | 0 | 0 |
| 477 | 444 | 3 | -0.60714286 | 16.07846 | 5.59181  | 7.42172  | 0 | 0 | 0 |
| 478 | 444 | 3 | -0.60714286 | 16.07846 | 5.59181  | 17.31734 | 0 | 0 | 0 |
| 479 | 444 | 3 | -0.60714286 | 16.07846 | 13.55139 | 7.42172  | 0 | 0 | 0 |
| 480 | 444 | 3 | -0.60714286 | 16.07846 | 13.55139 | 17.31734 | 0 | 0 | 0 |
| 481 | 444 | 3 | -0.60714286 | 16.07846 | 21.51098 | 7.42172  | 0 | 0 | 0 |
| 482 | 444 | 3 | -0.60714286 | 16.07846 | 21.51098 | 17.31734 | 0 | 0 | 0 |
| 483 | 444 | 3 | -0.60714286 | 0.97557  | 6.34757  | 2.47391  | 0 | 0 | 0 |
| 484 | 444 | 3 | -0.60714286 | 0.97557  | 6.34757  | 12.36953 | 0 | 0 | 0 |
| 485 | 444 | 3 | -0.60714286 | 0.97557  | 14.30716 | 2.47391  | 0 | 0 | 0 |
| 486 | 444 | 3 | -0.60714286 | 0.97557  | 14.30716 | 12.36953 | 0 | 0 | 0 |
| 487 | 444 | 3 | -0.60714286 | 0.97557  | 22.26674 | 2.47391  | 0 | 0 | 0 |
| 488 | 444 | 3 | -0.60714286 | 0.97557  | 22.26674 | 12.36953 | 0 | 0 | 0 |
| 489 | 444 | 3 | -0.60714286 | 7.01673  | 6.34757  | 2.47391  | 0 | 0 | 0 |
| 490 | 444 | 3 | -0.60714286 | 7.01673  | 6.34757  | 12.36953 | 0 | 0 | 0 |
| 491 | 444 | 3 | -0.60714286 | 7.01673  | 14.30716 | 2.47391  | 0 | 0 | 0 |
| 492 | 444 | 3 | -0.60714286 | 7.01673  | 14.30716 | 12.36953 | 0 | 0 | 0 |
| 493 | 444 | 3 | -0.60714286 | 7.01673  | 22.26674 | 2.47391  | 0 | 0 | 0 |
| 494 | 444 | 3 | -0.60714286 | 7.01673  | 22.26674 | 12.36953 | 0 | 0 | 0 |
| 495 | 444 | 3 | -0.60714286 | 13.05788 | 6.34757  | 2.47391  | 0 | 0 | 0 |
| 496 | 444 | 3 | -0.60714286 | 13.05788 | 6.34757  | 12.36953 | 0 | 0 | 0 |
| 497 | 444 | 3 | -0.60714286 | 13.05788 | 14.30716 | 2.47391  | 0 | 0 | 0 |
| 498 | 444 | 3 | -0.60714286 | 13.05788 | 14.30716 | 12.36953 | 0 | 0 | 0 |
| 499 | 444 | 3 | -0.60714286 | 13.05788 | 22.26674 | 2.47391  | 0 | 0 | 0 |

500 444 3 -0.60714286 13.05788 22.26674 12.36953 0 0 0

Bonds

|    |   |     |     |
|----|---|-----|-----|
| 1  | 1 | 213 | 285 |
| 2  | 1 | 213 | 411 |
| 3  | 1 | 213 | 489 |
| 4  | 1 | 214 | 286 |
| 5  | 1 | 214 | 412 |
| 6  | 1 | 214 | 490 |
| 7  | 1 | 215 | 287 |
| 8  | 1 | 215 | 413 |
| 9  | 1 | 215 | 491 |
| 10 | 1 | 216 | 288 |
| 11 | 1 | 216 | 414 |
| 12 | 1 | 216 | 492 |
| 13 | 1 | 217 | 289 |
| 14 | 1 | 217 | 415 |
| 15 | 1 | 217 | 493 |
| 16 | 1 | 218 | 290 |
| 17 | 1 | 218 | 416 |
| 18 | 1 | 218 | 494 |
| 19 | 1 | 219 | 291 |
| 20 | 1 | 219 | 417 |
| 21 | 1 | 219 | 495 |
| 22 | 1 | 220 | 292 |
| 23 | 1 | 220 | 418 |
| 24 | 1 | 220 | 496 |
| 25 | 1 | 221 | 293 |
| 26 | 1 | 221 | 419 |
| 27 | 1 | 221 | 497 |
| 28 | 1 | 222 | 294 |
| 29 | 1 | 222 | 420 |
| 30 | 1 | 222 | 498 |

|    |   |     |     |
|----|---|-----|-----|
| 31 | 1 | 223 | 295 |
| 32 | 1 | 223 | 421 |
| 33 | 1 | 223 | 499 |
| 34 | 1 | 224 | 296 |
| 35 | 1 | 224 | 422 |
| 36 | 1 | 224 | 500 |
| 37 | 1 | 225 | 297 |
| 38 | 1 | 225 | 423 |
| 39 | 1 | 225 | 483 |
| 40 | 1 | 226 | 298 |
| 41 | 1 | 226 | 424 |
| 42 | 1 | 226 | 484 |
| 43 | 1 | 227 | 299 |
| 44 | 1 | 227 | 425 |
| 45 | 1 | 227 | 485 |
| 46 | 1 | 228 | 300 |
| 47 | 1 | 228 | 426 |
| 48 | 1 | 228 | 486 |
| 49 | 1 | 229 | 301 |
| 50 | 1 | 229 | 427 |
| 51 | 1 | 229 | 487 |
| 52 | 1 | 230 | 302 |
| 53 | 1 | 230 | 428 |
| 54 | 1 | 230 | 488 |
| 55 | 1 | 231 | 303 |
| 56 | 1 | 231 | 393 |
| 57 | 1 | 231 | 465 |
| 58 | 1 | 232 | 304 |
| 59 | 1 | 232 | 394 |
| 60 | 1 | 232 | 466 |
| 61 | 1 | 233 | 305 |
| 62 | 1 | 233 | 395 |
| 63 | 1 | 233 | 467 |

|    |   |     |     |
|----|---|-----|-----|
| 64 | 1 | 234 | 306 |
| 65 | 1 | 234 | 396 |
| 66 | 1 | 234 | 468 |
| 67 | 1 | 235 | 307 |
| 68 | 1 | 235 | 397 |
| 69 | 1 | 235 | 469 |
| 70 | 1 | 236 | 308 |
| 71 | 1 | 236 | 398 |
| 72 | 1 | 236 | 470 |
| 73 | 1 | 237 | 309 |
| 74 | 1 | 237 | 399 |
| 75 | 1 | 237 | 471 |
| 76 | 1 | 238 | 310 |
| 77 | 1 | 238 | 400 |
| 78 | 1 | 238 | 472 |
| 79 | 1 | 239 | 311 |
| 80 | 1 | 239 | 401 |
| 81 | 1 | 239 | 473 |
| 82 | 1 | 240 | 312 |
| 83 | 1 | 240 | 402 |
| 84 | 1 | 240 | 474 |
| 85 | 1 | 241 | 313 |
| 86 | 1 | 241 | 403 |
| 87 | 1 | 241 | 475 |
| 88 | 1 | 242 | 314 |
| 89 | 1 | 242 | 404 |
| 90 | 1 | 242 | 476 |
| 91 | 1 | 243 | 315 |
| 92 | 1 | 243 | 405 |
| 93 | 1 | 243 | 477 |
| 94 | 1 | 244 | 316 |
| 95 | 1 | 244 | 406 |
| 96 | 1 | 244 | 478 |

|     |   |     |     |
|-----|---|-----|-----|
| 97  | 1 | 245 | 317 |
| 98  | 1 | 245 | 407 |
| 99  | 1 | 245 | 479 |
| 100 | 1 | 246 | 318 |
| 101 | 1 | 246 | 408 |
| 102 | 1 | 246 | 480 |
| 103 | 1 | 247 | 319 |
| 104 | 1 | 247 | 409 |
| 105 | 1 | 247 | 481 |
| 106 | 1 | 248 | 320 |
| 107 | 1 | 248 | 410 |
| 108 | 1 | 248 | 482 |
| 109 | 1 | 249 | 321 |
| 110 | 1 | 249 | 375 |
| 111 | 1 | 249 | 447 |
| 112 | 1 | 250 | 322 |
| 113 | 1 | 250 | 376 |
| 114 | 1 | 250 | 448 |
| 115 | 1 | 251 | 323 |
| 116 | 1 | 251 | 377 |
| 117 | 1 | 251 | 449 |
| 118 | 1 | 252 | 324 |
| 119 | 1 | 252 | 378 |
| 120 | 1 | 252 | 450 |
| 121 | 1 | 253 | 325 |
| 122 | 1 | 253 | 379 |
| 123 | 1 | 253 | 451 |
| 124 | 1 | 254 | 326 |
| 125 | 1 | 254 | 380 |
| 126 | 1 | 254 | 452 |
| 127 | 1 | 255 | 327 |
| 128 | 1 | 255 | 381 |
| 129 | 1 | 255 | 453 |

|     |   |     |     |
|-----|---|-----|-----|
| 130 | 1 | 256 | 328 |
| 131 | 1 | 256 | 382 |
| 132 | 1 | 256 | 454 |
| 133 | 1 | 257 | 329 |
| 134 | 1 | 257 | 383 |
| 135 | 1 | 257 | 455 |
| 136 | 1 | 258 | 330 |
| 137 | 1 | 258 | 384 |
| 138 | 1 | 258 | 456 |
| 139 | 1 | 259 | 331 |
| 140 | 1 | 259 | 385 |
| 141 | 1 | 259 | 457 |
| 142 | 1 | 260 | 332 |
| 143 | 1 | 260 | 386 |
| 144 | 1 | 260 | 458 |
| 145 | 1 | 261 | 333 |
| 146 | 1 | 261 | 387 |
| 147 | 1 | 261 | 459 |
| 148 | 1 | 262 | 334 |
| 149 | 1 | 262 | 388 |
| 150 | 1 | 262 | 460 |
| 151 | 1 | 263 | 335 |
| 152 | 1 | 263 | 389 |
| 153 | 1 | 263 | 461 |
| 154 | 1 | 264 | 336 |
| 155 | 1 | 264 | 390 |
| 156 | 1 | 264 | 462 |
| 157 | 1 | 265 | 337 |
| 158 | 1 | 265 | 391 |
| 159 | 1 | 265 | 463 |
| 160 | 1 | 266 | 338 |
| 161 | 1 | 266 | 392 |
| 162 | 1 | 266 | 464 |

|     |   |     |     |
|-----|---|-----|-----|
| 163 | 1 | 267 | 339 |
| 164 | 1 | 267 | 357 |
| 165 | 1 | 267 | 441 |
| 166 | 1 | 268 | 340 |
| 167 | 1 | 268 | 358 |
| 168 | 1 | 268 | 442 |
| 169 | 1 | 269 | 341 |
| 170 | 1 | 269 | 359 |
| 171 | 1 | 269 | 443 |
| 172 | 1 | 270 | 342 |
| 173 | 1 | 270 | 360 |
| 174 | 1 | 270 | 444 |
| 175 | 1 | 271 | 343 |
| 176 | 1 | 271 | 361 |
| 177 | 1 | 271 | 445 |
| 178 | 1 | 272 | 344 |
| 179 | 1 | 272 | 362 |
| 180 | 1 | 272 | 446 |
| 181 | 1 | 273 | 345 |
| 182 | 1 | 273 | 363 |
| 183 | 1 | 273 | 429 |
| 184 | 1 | 274 | 346 |
| 185 | 1 | 274 | 364 |
| 186 | 1 | 274 | 430 |
| 187 | 1 | 275 | 347 |
| 188 | 1 | 275 | 365 |
| 189 | 1 | 275 | 431 |
| 190 | 1 | 276 | 348 |
| 191 | 1 | 276 | 366 |
| 192 | 1 | 276 | 432 |
| 193 | 1 | 277 | 349 |
| 194 | 1 | 277 | 367 |
| 195 | 1 | 277 | 433 |



|     |   |     |     |
|-----|---|-----|-----|
| 196 | 1 | 278 | 350 |
| 197 | 1 | 278 | 368 |
| 198 | 1 | 278 | 434 |
| 199 | 1 | 279 | 351 |
| 200 | 1 | 279 | 369 |
| 201 | 1 | 279 | 435 |
| 202 | 1 | 280 | 352 |
| 203 | 1 | 280 | 370 |
| 204 | 1 | 280 | 436 |
| 205 | 1 | 281 | 353 |
| 206 | 1 | 281 | 371 |
| 207 | 1 | 281 | 437 |
| 208 | 1 | 282 | 354 |
| 209 | 1 | 282 | 372 |
| 210 | 1 | 282 | 438 |
| 211 | 1 | 283 | 355 |
| 212 | 1 | 283 | 373 |
| 213 | 1 | 283 | 439 |
| 214 | 1 | 284 | 356 |
| 215 | 1 | 284 | 374 |
| 216 | 1 | 284 | 440 |

Angles

|    |   |     |     |     |
|----|---|-----|-----|-----|
| 1  | 1 | 357 | 267 | 339 |
| 2  | 1 | 358 | 268 | 340 |
| 3  | 1 | 359 | 269 | 341 |
| 4  | 1 | 360 | 270 | 342 |
| 5  | 1 | 361 | 271 | 343 |
| 6  | 1 | 362 | 272 | 344 |
| 7  | 1 | 363 | 273 | 345 |
| 8  | 1 | 364 | 274 | 346 |
| 9  | 1 | 365 | 275 | 347 |
| 10 | 1 | 366 | 276 | 348 |
| 11 | 1 | 367 | 277 | 349 |

|    |   |     |     |     |
|----|---|-----|-----|-----|
| 12 | 1 | 368 | 278 | 350 |
| 13 | 1 | 369 | 279 | 351 |
| 14 | 1 | 370 | 280 | 352 |
| 15 | 1 | 371 | 281 | 353 |
| 16 | 1 | 372 | 282 | 354 |
| 17 | 1 | 373 | 283 | 355 |
| 18 | 1 | 374 | 284 | 356 |
| 19 | 1 | 375 | 249 | 321 |
| 20 | 1 | 376 | 250 | 322 |
| 21 | 1 | 377 | 251 | 323 |
| 22 | 1 | 378 | 252 | 324 |
| 23 | 1 | 379 | 253 | 325 |
| 24 | 1 | 380 | 254 | 326 |
| 25 | 1 | 381 | 255 | 327 |
| 26 | 1 | 382 | 256 | 328 |
| 27 | 1 | 383 | 257 | 329 |
| 28 | 1 | 384 | 258 | 330 |
| 29 | 1 | 385 | 259 | 331 |
| 30 | 1 | 386 | 260 | 332 |
| 31 | 1 | 387 | 261 | 333 |
| 32 | 1 | 388 | 262 | 334 |
| 33 | 1 | 389 | 263 | 335 |
| 34 | 1 | 390 | 264 | 336 |
| 35 | 1 | 391 | 265 | 337 |
| 36 | 1 | 392 | 266 | 338 |
| 37 | 1 | 393 | 231 | 303 |
| 38 | 1 | 394 | 232 | 304 |
| 39 | 1 | 395 | 233 | 305 |
| 40 | 1 | 396 | 234 | 306 |
| 41 | 1 | 397 | 235 | 307 |
| 42 | 1 | 398 | 236 | 308 |
| 43 | 1 | 399 | 237 | 309 |
| 44 | 1 | 400 | 238 | 310 |

|    |   |     |     |     |
|----|---|-----|-----|-----|
| 45 | 1 | 401 | 239 | 311 |
| 46 | 1 | 402 | 240 | 312 |
| 47 | 1 | 403 | 241 | 313 |
| 48 | 1 | 404 | 242 | 314 |
| 49 | 1 | 405 | 243 | 315 |
| 50 | 1 | 406 | 244 | 316 |
| 51 | 1 | 407 | 245 | 317 |
| 52 | 1 | 408 | 246 | 318 |
| 53 | 1 | 409 | 247 | 319 |
| 54 | 1 | 410 | 248 | 320 |
| 55 | 1 | 411 | 213 | 285 |
| 56 | 1 | 412 | 214 | 286 |
| 57 | 1 | 413 | 215 | 287 |
| 58 | 1 | 414 | 216 | 288 |
| 59 | 1 | 415 | 217 | 289 |
| 60 | 1 | 416 | 218 | 290 |
| 61 | 1 | 417 | 219 | 291 |
| 62 | 1 | 418 | 220 | 292 |
| 63 | 1 | 419 | 221 | 293 |
| 64 | 1 | 420 | 222 | 294 |
| 65 | 1 | 421 | 223 | 295 |
| 66 | 1 | 422 | 224 | 296 |
| 67 | 1 | 423 | 225 | 297 |
| 68 | 1 | 424 | 226 | 298 |
| 69 | 1 | 425 | 227 | 299 |
| 70 | 1 | 426 | 228 | 300 |
| 71 | 1 | 427 | 229 | 301 |
| 72 | 1 | 428 | 230 | 302 |
| 73 | 1 | 429 | 273 | 345 |
| 74 | 1 | 429 | 273 | 363 |
| 75 | 1 | 430 | 274 | 346 |
| 76 | 1 | 430 | 274 | 364 |
| 77 | 1 | 431 | 275 | 347 |

|     |   |     |     |     |
|-----|---|-----|-----|-----|
| 78  | 1 | 431 | 275 | 365 |
| 79  | 1 | 432 | 276 | 348 |
| 80  | 1 | 432 | 276 | 366 |
| 81  | 1 | 433 | 277 | 349 |
| 82  | 1 | 433 | 277 | 367 |
| 83  | 1 | 434 | 278 | 350 |
| 84  | 1 | 434 | 278 | 368 |
| 85  | 1 | 435 | 279 | 351 |
| 86  | 1 | 435 | 279 | 369 |
| 87  | 1 | 436 | 280 | 352 |
| 88  | 1 | 436 | 280 | 370 |
| 89  | 1 | 437 | 281 | 353 |
| 90  | 1 | 437 | 281 | 371 |
| 91  | 1 | 438 | 282 | 354 |
| 92  | 1 | 438 | 282 | 372 |
| 93  | 1 | 439 | 283 | 355 |
| 94  | 1 | 439 | 283 | 373 |
| 95  | 1 | 440 | 284 | 356 |
| 96  | 1 | 440 | 284 | 374 |
| 97  | 1 | 441 | 267 | 339 |
| 98  | 1 | 441 | 267 | 357 |
| 99  | 1 | 442 | 268 | 340 |
| 100 | 1 | 442 | 268 | 358 |
| 101 | 1 | 443 | 269 | 341 |
| 102 | 1 | 443 | 269 | 359 |
| 103 | 1 | 444 | 270 | 342 |
| 104 | 1 | 444 | 270 | 360 |
| 105 | 1 | 445 | 271 | 343 |
| 106 | 1 | 445 | 271 | 361 |
| 107 | 1 | 446 | 272 | 344 |
| 108 | 1 | 446 | 272 | 362 |
| 109 | 1 | 447 | 249 | 321 |
| 110 | 1 | 447 | 249 | 375 |

|     |   |     |     |     |
|-----|---|-----|-----|-----|
| 111 | 1 | 448 | 250 | 322 |
| 112 | 1 | 448 | 250 | 376 |
| 113 | 1 | 449 | 251 | 323 |
| 114 | 1 | 449 | 251 | 377 |
| 115 | 1 | 450 | 252 | 324 |
| 116 | 1 | 450 | 252 | 378 |
| 117 | 1 | 451 | 253 | 325 |
| 118 | 1 | 451 | 253 | 379 |
| 119 | 1 | 452 | 254 | 326 |
| 120 | 1 | 452 | 254 | 380 |
| 121 | 1 | 453 | 255 | 327 |
| 122 | 1 | 453 | 255 | 381 |
| 123 | 1 | 454 | 256 | 328 |
| 124 | 1 | 454 | 256 | 382 |
| 125 | 1 | 455 | 257 | 329 |
| 126 | 1 | 455 | 257 | 383 |
| 127 | 1 | 456 | 258 | 330 |
| 128 | 1 | 456 | 258 | 384 |
| 129 | 1 | 457 | 259 | 331 |
| 130 | 1 | 457 | 259 | 385 |
| 131 | 1 | 458 | 260 | 332 |
| 132 | 1 | 458 | 260 | 386 |
| 133 | 1 | 459 | 261 | 333 |
| 134 | 1 | 459 | 261 | 387 |
| 135 | 1 | 460 | 262 | 334 |
| 136 | 1 | 460 | 262 | 388 |
| 137 | 1 | 461 | 263 | 335 |
| 138 | 1 | 461 | 263 | 389 |
| 139 | 1 | 462 | 264 | 336 |
| 140 | 1 | 462 | 264 | 390 |
| 141 | 1 | 463 | 265 | 337 |
| 142 | 1 | 463 | 265 | 391 |
| 143 | 1 | 464 | 266 | 338 |

|     |   |     |     |     |
|-----|---|-----|-----|-----|
| 144 | 1 | 464 | 266 | 392 |
| 145 | 1 | 465 | 231 | 303 |
| 146 | 1 | 465 | 231 | 393 |
| 147 | 1 | 466 | 232 | 304 |
| 148 | 1 | 466 | 232 | 394 |
| 149 | 1 | 467 | 233 | 305 |
| 150 | 1 | 467 | 233 | 395 |
| 151 | 1 | 468 | 234 | 306 |
| 152 | 1 | 468 | 234 | 396 |
| 153 | 1 | 469 | 235 | 307 |
| 154 | 1 | 469 | 235 | 397 |
| 155 | 1 | 470 | 236 | 308 |
| 156 | 1 | 470 | 236 | 398 |
| 157 | 1 | 471 | 237 | 309 |
| 158 | 1 | 471 | 237 | 399 |
| 159 | 1 | 472 | 238 | 310 |
| 160 | 1 | 472 | 238 | 400 |
| 161 | 1 | 473 | 239 | 311 |
| 162 | 1 | 473 | 239 | 401 |
| 163 | 1 | 474 | 240 | 312 |
| 164 | 1 | 474 | 240 | 402 |
| 165 | 1 | 475 | 241 | 313 |
| 166 | 1 | 475 | 241 | 403 |
| 167 | 1 | 476 | 242 | 314 |
| 168 | 1 | 476 | 242 | 404 |
| 169 | 1 | 477 | 243 | 315 |
| 170 | 1 | 477 | 243 | 405 |
| 171 | 1 | 478 | 244 | 316 |
| 172 | 1 | 478 | 244 | 406 |
| 173 | 1 | 479 | 245 | 317 |
| 174 | 1 | 479 | 245 | 407 |
| 175 | 1 | 480 | 246 | 318 |
| 176 | 1 | 480 | 246 | 408 |

|     |   |     |     |     |
|-----|---|-----|-----|-----|
| 177 | 1 | 481 | 247 | 319 |
| 178 | 1 | 481 | 247 | 409 |
| 179 | 1 | 482 | 248 | 320 |
| 180 | 1 | 482 | 248 | 410 |
| 181 | 1 | 483 | 225 | 297 |
| 182 | 1 | 483 | 225 | 423 |
| 183 | 1 | 484 | 226 | 298 |
| 184 | 1 | 484 | 226 | 424 |
| 185 | 1 | 485 | 227 | 299 |
| 186 | 1 | 485 | 227 | 425 |
| 187 | 1 | 486 | 228 | 300 |
| 188 | 1 | 486 | 228 | 426 |
| 189 | 1 | 487 | 229 | 301 |
| 190 | 1 | 487 | 229 | 427 |
| 191 | 1 | 488 | 230 | 302 |
| 192 | 1 | 488 | 230 | 428 |
| 193 | 1 | 489 | 213 | 285 |
| 194 | 1 | 489 | 213 | 411 |
| 195 | 1 | 490 | 214 | 286 |
| 196 | 1 | 490 | 214 | 412 |
| 197 | 1 | 491 | 215 | 287 |
| 198 | 1 | 491 | 215 | 413 |
| 199 | 1 | 492 | 216 | 288 |
| 200 | 1 | 492 | 216 | 414 |
| 201 | 1 | 493 | 217 | 289 |
| 202 | 1 | 493 | 217 | 415 |
| 203 | 1 | 494 | 218 | 290 |
| 204 | 1 | 494 | 218 | 416 |
| 205 | 1 | 495 | 219 | 291 |
| 206 | 1 | 495 | 219 | 417 |
| 207 | 1 | 496 | 220 | 292 |
| 208 | 1 | 496 | 220 | 418 |
| 209 | 1 | 497 | 221 | 293 |

|     |   |     |     |     |
|-----|---|-----|-----|-----|
| 210 | 1 | 497 | 221 | 419 |
| 211 | 1 | 498 | 222 | 294 |
| 212 | 1 | 498 | 222 | 420 |
| 213 | 1 | 499 | 223 | 295 |
| 214 | 1 | 499 | 223 | 421 |
| 215 | 1 | 500 | 224 | 296 |
| 216 | 1 | 500 | 224 | 422 |



Table 10. Forcefield Parameters Used

Pair Coeffs

|   |            |            |               |
|---|------------|------------|---------------|
| 1 | 0.02500000 | 3.20002089 | # Li Li       |
| 2 | 0.18000001 | 2.29053963 | # B_2 B_2     |
| 3 | 0.27399999 | 2.55088067 | # S_3+6 S_3+6 |

Bond Coeffs

|   |         |        |             |
|---|---------|--------|-------------|
| 1 | 234.939 | 1.8557 | # S_3+6 B_2 |
|---|---------|--------|-------------|

Angle Coeffs

|   |         |           |                   |
|---|---------|-----------|-------------------|
| 1 | 241.304 | 120.00000 | # S_3+6 B_2 S_3+6 |
|---|---------|-----------|-------------------|



























## References

1. Vinatier, P., Gravereau, P., Ménétrier, M., Trut, L. & Levasseur, A. Li<sub>3</sub>BS<sub>3</sub>. *Acta Crystallogr. C* 50, 1180–1183 (1994)
2. Thompson, A. P., Aktulga, H. M., Berger, R., Bolintineanu, D. S., Brown, W. M., Crozier, P. S., in 't Veld, P. J., Kohlmeyer, A., Moore, S. G., Nguyen, T. D., Shan, R., Stevens, M. J., Tranchida, J., Trott, C., & Plimpton, S. J. (2022). LAMMPS - a flexible simulation tool for particle-based materials modeling at the atomic, meso, and continuum scales.
3. Das, T., Yang, M. Y., Merinov, B. v, & Goddard, W. A. (2024). Atomistic Simulations of Battery Materials and Processes. In D. A. H. Hanaor (Ed.), *Computational Design of Battery Materials* (pp. 13–76). Springer International Publishing. [https://doi.org/10.1007/978-3-031-47303-6\\_2](https://doi.org/10.1007/978-3-031-47303-6_2)
4. Kharton, V. v. (Ed.). (2011). *Solid State Electrochemistry I*. Wiley. <https://doi.org/10.1002/9783527635566>
5. Schlem, R., Banik, A., Ohno, S., Suard, E., & G. Zeier, W. (2021). Insights into the Lithium Sub-structure of Superionic Conductors Li<sub>3</sub>YCl<sub>6</sub> and Li<sub>3</sub>YBr<sub>6</sub>. *Chemistry of Materials*, 33(1), 327–337. <https://doi.org/10.1021/acs.chemmater.0c04352>
6. Yang, S., Young Kim, S., & Chen, G. (2024). Halide Superionic Conductors for All-Solid-State Batteries: Effects of Synthesis and Composition on Lithium-Ion Conductivity. *ACS Energy Letters*, 0(0), 2212–2221. <https://doi.org/10.1021/acsenergylett.4c00317>
7. Perdew, J. P., Burke, K., & Ernzerhof, M. (1996). Generalized Gradient Approximation Made Simple. *Physical Review Letters*, 77(18), 3865–3868. <https://doi.org/10.1103/PhysRevLett.77.3865>
8. Kresse, G., & Hafner, J. (1993). Ab initio molecular dynamics for liquid metals. *Physical Review B*, 47(1), 558–561. <https://doi.org/10.1103/PhysRevB.47.558>
9. Rappe, A. K.; Casewit, C. J.; Colwell, K. S.; Goddard, W. A., III; Skiff, W. M. UFF, a Full Periodic Table Force Field for Molecular Mechanics and Molecular Dynamics Simulations. *J. Am. Chem. Soc.* 1992, 114 (25), 10024-10035. DOI: 10.1021/ja00051a040.
10. Introducing DDEC6 atomic population analysis: part 1. Charge partitioning theory and methodology. *RSC Advances*, 6(53), 47771–47801. <https://doi.org/10.1039/C6RA04656H>
11. Das, T., Merinov, B. v, Yang, M. Y., & Goddard III, W. A. (2022). Structural, dynamic, and diffusion properties of a Li<sub>6</sub>(PS<sub>4</sub>)SCl superionic conductor from molecular dynamics simulations; prediction of a dramatically improved conductor. *J. Mater. Chem. A*, 10(30), 16319–16327. <https://doi.org/10.1039/D2TA02715A>
12. Lee, J.-S., Adams, S., & Maier, J. (2000). Transport and phase transition characteristics in AgI composite electrolytes: Evidence for a highly conducting 7-layer AgI polytype. *Journal of The Electrochemical Society*, 147(6), 2407-2418. <https://doi.org/10.1149/1.1393515>

13. Characteristics of a Li<sub>3</sub>BS<sub>3</sub> Thioborate Glass Electrolyte Obtained via a Mechanochemical Process. *ACS Applied Energy Materials*, 5(2), 1421–1426.  
<https://doi.org/10.1021/acsaem.1c02452>
14. Fertig, D., & Stephan, S. (2023). Influence of dispersive long-range interactions on transport and excess properties of simple mixtures. *Molecular Physics*, 121(19–20).  
<https://doi.org/10.1080/00268976.2022.2162993>
15. Bianchini, F., Fjellvåg, H., & Vajeeston, P. (2018). A first-principle investigation of the Li diffusion mechanism in the super-ionic conductor lithium orthothioborate Li<sub>3</sub>BS<sub>3</sub> structure. *Materials Letters*, 219, 186–189. <https://doi.org/https://doi.org/10.1016/j.matlet.2018.02.083>
16. Laskowski, F. A. L., McHaffie, D. B., & See, K. A. (2022). Identification of Potential Solid-State Li-Ion Conductors with Semi-Supervised Learning. *ChemRxiv*. doi:10.26434/chemrxiv-2022-2m3qb This content is a preprint and has not been peer-reviewed.
